# Supplementary material for: Multi-omics analysis of the co-expression features of specific neighboring gene pairs suggests an association with catechin regulation in Camellia sinensis
Source: Research Square preprint supplement (doi:10.21203/rs.3.rs-7249588/v1), 2025-08-19
Supplement: Supplementary file 1 [file 0e14b7b720466a5655291f25.xlsx]

## Sheet: Sheet1
Supplementary table 2. Gene IDs of specific neighboring gene pairs
Gene1	Gene2
CaS01G000630	CaS01G000640
CaS01G000870	CaS01G000880
CaS01G001310	CaS01G001320
CaS01G001320	CaS01G001330
CaS01G001440	CaS01G001450
CaS01G001990	CaS01G002000
CaS01G002710	CaS01G002720
CaS01G003680	CaS01G003690
CaS01G006140	CaS01G006150
CaS01G006380	CaS01G006390
CaS01G006540	CaS01G006550
CaS01G006720	CaS01G006730
CaS01G007730	CaS01G007740
CaS01G007890	CaS01G007900
CaS01G008480	CaS01G008490
CaS01G008850	CaS01G008860
CaS01G008990	CaS01G009000
CaS01G009240	CaS01G009250
CaS01G009910	CaS01G009920
CaS01G010520	CaS01G010530
CaS01G010530	CaS01G010540
CaS01G010700	CaS01G010710
CaS01G011030	CaS01G011040
CaS01G011060	CaS01G011070
CaS01G011470	CaS01G011480
CaS01G013210	CaS01G013220
CaS01G013350	CaS01G013360
CaS01G015550	CaS01G015560
CaS01G015620	CaS01G015630
CaS01G016290	CaS01G016300
CaS01G019430	CaS01G019440
CaS01G019850	CaS01G019860
CaS01G020330	CaS01G020340
CaS01G021020	CaS01G021030
CaS01G021050	CaS01G021060
CaS01G021500	CaS01G021510
CaS01G021650	CaS01G021660
CaS01G024650	CaS01G024660
CaS01G025020	CaS01G025030
CaS01G025030	CaS01G025040
CaS01G028350	CaS01G028360
CaS01G028660	CaS01G028670
CaS01G028960	CaS01G028970
CaS01G029690	CaS01G029700
CaS01G030230	CaS01G030240
CaS01G030390	CaS01G030400
CaS01G030500	CaS01G030510
CaS01G031060	CaS01G031070
CaS01G031360	CaS01G031370
CaS01G031500	CaS01G031510
CaS01G031960	CaS01G031970
CaS01G032740	CaS01G032750
CaS01G032970	CaS01G032980
CaS01G033390	CaS01G033400
CaS01G033480	CaS01G033490
CaS01G033510	CaS01G033520
CaS01G033840	CaS01G033850
CaS01G033880	CaS01G033890
CaS02G000260	CaS02G000270
CaS02G001250	CaS02G001260
CaS02G001420	CaS02G001430
CaS02G001430	CaS02G001440
CaS02G002040	CaS02G002050
CaS02G003770	CaS02G003780
CaS02G004780	CaS02G004790
CaS02G004940	CaS02G004950
CaS02G005340	CaS02G005350
CaS02G006060	CaS02G006070
CaS02G006070	CaS02G006080
CaS02G008030	CaS02G008040
CaS02G008080	CaS02G008090
CaS02G008450	CaS02G008460
CaS02G009190	CaS02G009200
CaS02G012990	CaS02G013000
CaS02G013260	CaS02G013270
CaS02G014000	CaS02G014010
CaS02G014190	CaS02G014200
CaS02G014200	CaS02G014210
CaS02G014390	CaS02G014400
CaS02G015230	CaS02G015240
CaS02G017300	CaS02G017310
CaS02G018680	CaS02G018690
CaS02G018690	CaS02G018700
CaS02G018720	CaS02G018730
CaS02G018960	CaS02G018970
CaS02G019110	CaS02G019120
CaS02G019120	CaS02G019130
CaS02G019580	CaS02G019590
CaS02G019590	CaS02G019600
CaS02G020030	CaS02G020040
CaS02G020260	CaS02G020270
CaS02G020820	CaS02G020830
CaS02G021010	CaS02G021020
CaS02G022340	CaS02G022350
CaS02G022350	CaS02G022360
CaS02G023300	CaS02G023310
CaS02G023550	CaS02G023560
CaS02G023810	CaS02G023820
CaS03G000050	CaS03G000060
CaS03G000060	CaS03G000070
CaS03G000090	CaS03G000100
CaS03G003430	CaS03G003440
CaS03G004270	CaS03G004280
CaS03G004470	CaS03G004480
CaS03G004730	CaS03G004740
CaS03G005070	CaS03G005080
CaS03G005730	CaS03G005740
CaS03G006440	CaS03G006450
CaS03G006500	CaS03G006510
CaS03G007510	CaS03G007520
CaS03G007990	CaS03G008000
CaS03G008070	CaS03G008080
CaS03G008810	CaS03G008820
CaS03G009980	CaS03G009990
CaS03G011030	CaS03G011040
CaS03G011270	CaS03G011280
CaS03G012880	CaS03G012890
CaS03G013100	CaS03G013110
CaS03G013170	CaS03G013180
CaS03G013400	CaS03G013410
CaS03G013490	CaS03G013500
CaS03G015200	CaS03G015210
CaS03G015480	CaS03G015490
CaS03G016310	CaS03G016320
CaS03G017830	CaS03G017840
CaS03G017920	CaS03G017930
CaS03G018390	CaS03G018400
CaS03G018540	CaS03G018550
CaS04G001970	CaS04G001980
CaS04G001980	CaS04G001990
CaS04G003040	CaS04G003050
CaS04G003120	CaS04G003130
CaS04G003350	CaS04G003360
CaS04G003570	CaS04G003580
CaS04G003580	CaS04G003590
CaS04G003740	CaS04G003750
CaS04G004300	CaS04G004310
CaS04G004540	CaS04G004550
CaS04G004780	CaS04G004790
CaS04G005900	CaS04G005910
CaS04G006400	CaS04G006410
CaS04G006410	CaS04G006420
CaS04G008130	CaS04G008140
CaS04G008690	CaS04G008700
CaS04G008750	CaS04G008760
CaS04G009180	CaS04G009190
CaS04G010590	CaS04G010600
CaS04G010710	CaS04G010720
CaS04G012840	CaS04G012850
CaS04G013350	CaS04G013360
CaS04G013750	CaS04G013760
CaS04G013850	CaS04G013860
CaS04G014130	CaS04G014140
CaS04G014210	CaS04G014220
CaS04G014270	CaS04G014280
CaS04G015420	CaS04G015430
CaS04G015560	CaS04G015570
CaS04G016200	CaS04G016210
CaS04G016310	CaS04G016320
CaS04G016890	CaS04G016900
CaS04G017060	CaS04G017070
CaS04G017080	CaS04G017090
CaS04G017510	CaS04G017520
CaS04G017520	CaS04G017530
CaS04G017530	CaS04G017540
CaS04G017670	CaS04G017680
CaS04G018040	CaS04G018050
CaS04G018050	CaS04G018060
CaS04G018070	CaS04G018080
CaS04G018820	CaS04G018830
CaS04G019090	CaS04G019100
CaS04G019340	CaS04G019350
CaS04G019710	CaS04G019720
CaS04G019900	CaS04G019910
CaS04G020510	CaS04G020520
CaS04G021320	CaS04G021330
CaS04G021610	CaS04G021620
CaS04G022180	CaS04G022190
CaS04G022980	CaS04G022990
CaS04G023600	CaS04G023610
CaS04G023890	CaS04G023900
CaS04G024010	CaS04G024020
CaS04G024100	CaS04G024110
CaS04G024690	CaS04G024700
CaS05G000050	CaS05G000060
CaS05G000680	CaS05G000690
CaS05G001000	CaS05G001010
CaS05G001110	CaS05G001120
CaS05G001850	CaS05G001860
CaS05G002040	CaS05G002050
CaS05G002330	CaS05G002340
CaS05G002390	CaS05G002400
CaS05G004290	CaS05G004300
CaS05G005070	CaS05G005080
CaS05G006040	CaS05G006050
CaS05G007130	CaS05G007140
CaS05G007450	CaS05G007460
CaS05G007820	CaS05G007830
CaS05G008800	CaS05G008810
CaS05G008860	CaS05G008870
CaS05G008870	CaS05G008880
CaS05G009100	CaS05G009110
CaS05G009590	CaS05G009600
CaS05G010430	CaS05G010440
CaS05G010780	CaS05G010790
CaS05G011250	CaS05G011260
CaS05G011570	CaS05G011580
CaS05G011620	CaS05G011630
CaS05G011900	CaS05G011910
CaS05G012300	CaS05G012310
CaS05G012400	CaS05G012410
CaS05G012500	CaS05G012510
CaS05G013560	CaS05G013570
CaS05G013950	CaS05G013960
CaS05G014250	CaS05G014260
CaS05G014430	CaS05G014440
CaS05G014700	CaS05G014710
CaS05G016700	CaS05G016710
CaS05G016980	CaS05G016990
CaS05G017210	CaS05G017220
CaS05G017940	CaS05G017950
CaS05G018160	CaS05G018170
CaS05G018580	CaS05G018590
CaS05G018770	CaS05G018780
CaS05G019320	CaS05G019330
CaS05G019800	CaS05G019810
CaS05G019880	CaS05G019890
CaS05G019900	CaS05G019910
CaS05G020090	CaS05G020100
CaS05G020100	CaS05G020110
CaS05G020120	CaS05G020130
CaS05G020450	CaS05G020460
CaS05G021050	CaS05G021060
CaS05G021850	CaS05G021860
CaS05G021930	CaS05G021940
CaS05G022770	CaS05G022780
CaS05G022780	CaS05G022790
CaS05G022840	CaS05G022850
CaS05G023090	CaS05G023100
CaS05G023100	CaS05G023110
CaS05G023360	CaS05G023370
CaS05G023610	CaS05G023620
CaS05G023940	CaS05G023950
CaS05G023960	CaS05G023970
CaS05G024420	CaS05G024430
CaS05G026210	CaS05G026220
CaS05G026490	CaS05G026500
CaS05G026900	CaS05G026910
CaS05G026920	CaS05G026930
CaS05G027230	CaS05G027240
CaS05G029220	CaS05G029230
CaS05G029760	CaS05G029770
CaS05G029770	CaS05G029780
CaS05G030700	CaS05G030710
CaS05G032270	CaS05G032280
CaS05G032670	CaS05G032680
CaS05G033010	CaS05G033020
CaS05G033330	CaS05G033340
CaS05G033640	CaS05G033650
CaS05G033650	CaS05G033660
CaS05G033660	CaS05G033670
CaS05G034170	CaS05G034180
CaS05G034260	CaS05G034270
CaS05G035070	CaS05G035080
CaS05G035970	CaS05G035980
CaS05G037340	CaS05G037350
CaS06G000630	CaS06G000640
CaS06G001490	CaS06G001500
CaS06G002880	CaS06G002890
CaS06G003180	CaS06G003190
CaS06G004310	CaS06G004320
CaS06G004680	CaS06G004690
CaS06G004690	CaS06G004700
CaS06G004940	CaS06G004950
CaS06G005410	CaS06G005420
CaS06G006690	CaS06G006700
CaS06G006950	CaS06G006960
CaS06G007640	CaS06G007650
CaS06G009060	CaS06G009070
CaS06G009070	CaS06G009080
CaS06G009390	CaS06G009400
CaS06G010550	CaS06G010560
CaS06G011010	CaS06G011020
CaS06G011980	CaS06G011990
CaS06G012720	CaS06G012730
CaS06G013200	CaS06G013210
CaS06G013670	CaS06G013680
CaS06G014030	CaS06G014040
CaS06G015700	CaS06G015710
CaS06G015820	CaS06G015830
CaS06G015960	CaS06G015970
CaS06G017390	CaS06G017400
CaS06G017440	CaS06G017450
CaS06G017650	CaS06G017660
CaS06G017910	CaS06G017920
CaS06G018490	CaS06G018500
CaS06G018500	CaS06G018510
CaS06G018670	CaS06G018680
CaS06G018860	CaS06G018870
CaS06G018870	CaS06G018880
CaS06G018970	CaS06G018980
CaS06G018980	CaS06G018990
CaS06G019660	CaS06G019670
CaS06G019710	CaS06G019720
CaS06G020410	CaS06G020420
CaS06G021310	CaS06G021320
CaS06G022200	CaS06G022210
CaS06G022340	CaS06G022350
CaS06G022350	CaS06G022360
CaS06G022870	CaS06G022880
CaS06G024600	CaS06G024610
CaS06G024670	CaS06G024680
CaS06G024940	CaS06G024950
CaS06G025250	CaS06G025260
CaS06G025890	CaS06G025900
CaS06G025960	CaS06G025970
CaS06G025970	CaS06G025980
CaS06G026040	CaS06G026050
CaS06G026050	CaS06G026060
CaS06G026350	CaS06G026360
CaS06G026800	CaS06G026810
CaS06G028080	CaS06G028090
CaS06G028950	CaS06G028960
CaS06G029000	CaS06G029010
CaS06G030800	CaS06G030810
CaS06G031180	CaS06G031190
CaS06G031600	CaS06G031610
CaS06G033130	CaS06G033140
CaS06G033200	CaS06G033210
CaS06G033450	CaS06G033460
CaS06G034080	CaS06G034090
CaS07G000320	CaS07G000330
CaS07G000540	CaS07G000550
CaS07G002050	CaS07G002060
CaS07G002170	CaS07G002180
CaS07G002180	CaS07G002190
CaS07G002560	CaS07G002570
CaS07G003050	CaS07G003060
CaS07G003370	CaS07G003380
CaS07G003390	CaS07G003400
CaS07G003740	CaS07G003750
CaS07G003840	CaS07G003850
CaS07G004510	CaS07G004520
CaS07G006990	CaS07G007000
CaS07G007000	CaS07G007010
CaS07G007210	CaS07G007220
CaS07G007240	CaS07G007250
CaS07G007290	CaS07G007300
CaS07G007490	CaS07G007500
CaS07G007820	CaS07G007830
CaS07G008450	CaS07G008460
CaS07G008460	CaS07G008470
CaS07G009900	CaS07G009910
CaS07G010920	CaS07G010930
CaS07G011450	CaS07G011460
CaS07G012290	CaS07G012300
CaS07G013640	CaS07G013650
CaS07G014530	CaS07G014540
CaS07G014540	CaS07G014550
CaS07G014990	CaS07G015000
CaS07G015390	CaS07G015400
CaS07G016720	CaS07G016730
CaS07G016750	CaS07G016760
CaS07G017870	CaS07G017880
CaS07G018110	CaS07G018120
CaS07G018480	CaS07G018490
CaS07G019490	CaS07G019500
CaS07G019600	CaS07G019610
CaS07G019610	CaS07G019620
CaS08G001640	CaS08G001650
CaS08G002150	CaS08G002160
CaS08G002800	CaS08G002810
CaS08G003110	CaS08G003120
CaS08G003350	CaS08G003360
CaS08G003760	CaS08G003770
CaS08G003950	CaS08G003960
CaS08G004140	CaS08G004150
CaS08G005900	CaS08G005910
CaS08G005980	CaS08G005990
CaS08G006140	CaS08G006150
CaS08G006150	CaS08G006160
CaS08G007000	CaS08G007010
CaS08G009100	CaS08G009110
CaS08G009470	CaS08G009480
CaS08G009550	CaS08G009560
CaS08G009860	CaS08G009870
CaS08G010030	CaS08G010040
CaS08G010480	CaS08G010490
CaS08G011140	CaS08G011150
CaS08G011150	CaS08G011160
CaS08G011580	CaS08G011590
CaS08G011670	CaS08G011680
CaS08G011740	CaS08G011750
CaS08G012150	CaS08G012160
CaS08G012530	CaS08G012540
CaS08G013550	CaS08G013560
CaS08G013600	CaS08G013610
CaS08G013780	CaS08G013790
CaS08G013900	CaS08G013910
CaS08G013910	CaS08G013920
CaS08G014020	CaS08G014030
CaS08G014180	CaS08G014190
CaS08G015070	CaS08G015080
CaS08G015560	CaS08G015570
CaS08G015720	CaS08G015730
CaS08G016060	CaS08G016070
CaS08G016590	CaS08G016600
CaS08G016640	CaS08G016650
CaS08G016950	CaS08G016960
CaS08G016960	CaS08G016970
CaS08G017320	CaS08G017330
CaS08G017640	CaS08G017650
CaS08G017670	CaS08G017680
CaS08G017800	CaS08G017810
CaS08G018000	CaS08G018010
CaS08G018010	CaS08G018020
CaS08G019090	CaS08G019100
CaS08G021650	CaS08G021660
CaS08G021850	CaS08G021860
CaS08G022200	CaS08G022210
CaS08G023160	CaS08G023170
CaS08G023440	CaS08G023450
CaS09G001340	CaS09G001350
CaS09G002210	CaS09G002220
CaS09G004660	CaS09G004670
CaS09G004910	CaS09G004920
CaS09G005090	CaS09G005100
CaS09G005280	CaS09G005290
CaS09G005360	CaS09G005370
CaS09G005370	CaS09G005380
CaS09G006180	CaS09G006190
CaS09G006230	CaS09G006240
CaS09G006750	CaS09G006760
CaS09G007080	CaS09G007090
CaS09G007130	CaS09G007140
CaS09G007420	CaS09G007430
CaS09G007640	CaS09G007650
CaS09G007660	CaS09G007670
CaS09G007920	CaS09G007930
CaS09G008070	CaS09G008080
CaS09G008430	CaS09G008440
CaS09G008470	CaS09G008480
CaS09G008710	CaS09G008720
CaS09G009230	CaS09G009240
CaS09G009280	CaS09G009290
CaS09G009330	CaS09G009340
CaS09G009340	CaS09G009350
CaS09G010740	CaS09G010750
CaS09G010820	CaS09G010830
CaS09G010950	CaS09G010960
CaS09G011790	CaS09G011800
CaS09G012740	CaS09G012750
CaS09G014040	CaS09G014050
CaS09G014790	CaS09G014800
CaS09G014920	CaS09G014930
CaS09G016440	CaS09G016450
CaS09G017200	CaS09G017210
CaS09G017260	CaS09G017270
CaS09G017270	CaS09G017280
CaS09G017280	CaS09G017290
CaS09G018510	CaS09G018520
CaS09G020370	CaS09G020380
CaS09G020380	CaS09G020390
CaS09G020510	CaS09G020520
CaS10G000370	CaS10G000380
CaS10G000440	CaS10G000450
CaS10G001160	CaS10G001170
CaS10G001570	CaS10G001580
CaS10G002540	CaS10G002550
CaS10G002780	CaS10G002790
CaS10G003500	CaS10G003510
CaS10G003990	CaS10G004000
CaS10G005030	CaS10G005040
CaS10G005170	CaS10G005180
CaS10G005590	CaS10G005600
CaS10G007630	CaS10G007640
CaS10G008460	CaS10G008470
CaS10G008480	CaS10G008490
CaS10G009870	CaS10G009880
CaS10G010150	CaS10G010160
CaS10G010690	CaS10G010700
CaS10G011150	CaS10G011160
CaS10G011460	CaS10G011470
CaS10G011780	CaS10G011790
CaS10G012080	CaS10G012090
CaS10G012090	CaS10G012100
CaS10G012100	CaS10G012110
CaS10G013060	CaS10G013070
CaS10G013320	CaS10G013330
CaS10G013520	CaS10G013530
CaS10G013530	CaS10G013540
CaS10G013600	CaS10G013610
CaS10G014200	CaS10G014210
CaS10G014550	CaS10G014560
CaS10G014560	CaS10G014570
CaS10G014720	CaS10G014730
CaS10G014730	CaS10G014740
CaS10G015130	CaS10G015140
CaS10G015590	CaS10G015600
CaS10G015770	CaS10G015780
CaS10G016690	CaS10G016700
CaS10G016710	CaS10G016720
CaS10G016820	CaS10G016830
CaS10G016940	CaS10G016950
CaS10G016970	CaS10G016980
CaS10G020300	CaS10G020310
CaS10G020530	CaS10G020540
CaS10G020860	CaS10G020870
CaS10G022070	CaS10G022080
CaS10G022470	CaS10G022480
CaS10G022670	CaS10G022680
CaS10G022680	CaS10G022690
CaS10G023140	CaS10G023150
CaS10G023330	CaS10G023340
CaS10G023910	CaS10G023920
CaS10G024440	CaS10G024450
CaS10G024850	CaS10G024860
CaS10G024880	CaS10G024890
CaS10G024890	CaS10G024900
CaS10G026000	CaS10G026010
CaS10G026030	CaS10G026040
CaS10G026040	CaS10G026050
CaS10G026470	CaS10G026480
CaS10G027840	CaS10G027850
CaS10G027980	CaS10G027990
CaS10G027990	CaS10G028000
CaS11G002120	CaS11G002130
CaS11G002260	CaS11G002270
CaS11G002960	CaS11G002970
CaS11G004150	CaS11G004160
CaS11G004320	CaS11G004330
CaS11G006050	CaS11G006060
CaS11G006060	CaS11G006070
CaS11G006070	CaS11G006080
CaS11G006080	CaS11G006090
CaS11G006360	CaS11G006370
CaS11G006830	CaS11G006840
CaS11G006960	CaS11G006970
CaS11G007290	CaS11G007300
CaS11G007300	CaS11G007310
CaS11G007530	CaS11G007540
CaS11G007540	CaS11G007550
CaS11G008270	CaS11G008280
CaS11G008570	CaS11G008580
CaS11G009900	CaS11G009910
CaS11G010890	CaS11G010900
CaS11G011640	CaS11G011650
CaS11G012060	CaS11G012070
CaS11G014200	CaS11G014210
CaS11G014350	CaS11G014360
CaS11G014360	CaS11G014370
CaS11G014930	CaS11G014940
CaS11G015060	CaS11G015070
CaS11G015410	CaS11G015420
CaS11G015670	CaS11G015680
CaS11G017640	CaS11G017650
CaS11G018750	CaS11G018760
CaS11G019170	CaS11G019180
CaS11G019700	CaS11G019710
CaS11G019840	CaS11G019850
CaS11G019890	CaS11G019900
CaS11G020000	CaS11G020010
CaS11G020720	CaS11G020730
CaS11G021000	CaS11G021010
CaS11G022230	CaS11G022240
CaS11G022930	CaS11G022940
CaS11G023110	CaS11G023120
CaS11G023120	CaS11G023130
CaS11G023520	CaS11G023530
CaS11G023530	CaS11G023540
CaS11G023550	CaS11G023560
CaS11G023560	CaS11G023570
CaS11G024380	CaS11G024390
CaS11G024480	CaS11G024490
CaS11G024950	CaS11G024960
CaS11G024960	CaS11G024970
CaS11G025360	CaS11G025370
CaS11G025370	CaS11G025380
CaS12G000360	CaS12G000370
CaS12G001240	CaS12G001250
CaS12G001340	CaS12G001350
CaS12G001520	CaS12G001530
CaS12G001680	CaS12G001690
CaS12G001820	CaS12G001830
CaS12G001930	CaS12G001940
CaS12G002220	CaS12G002230
CaS12G002340	CaS12G002350
CaS12G002410	CaS12G002420
CaS12G002440	CaS12G002450
CaS12G002450	CaS12G002460
CaS12G002460	CaS12G002470
CaS12G002470	CaS12G002480
CaS12G003550	CaS12G003560
CaS12G003560	CaS12G003570
CaS12G003580	CaS12G003590
CaS12G003820	CaS12G003830
CaS12G003920	CaS12G003930
CaS12G004330	CaS12G004340
CaS12G004720	CaS12G004730
CaS12G006990	CaS12G007000
CaS12G007320	CaS12G007330
CaS12G008320	CaS12G008330
CaS12G008360	CaS12G008370
CaS12G008710	CaS12G008720
CaS12G008790	CaS12G008800
CaS12G008800	CaS12G008810
CaS12G010180	CaS12G010190
CaS12G010490	CaS12G010500
CaS12G010610	CaS12G010620
CaS12G011830	CaS12G011840
CaS12G013970	CaS12G013980
CaS12G013980	CaS12G013990
CaS12G020490	CaS12G020500
CaS12G020700	CaS12G020710
CaS12G022230	CaS12G022240
CaS12G026880	CaS12G026890
CaS13G000100	CaS13G000110
CaS13G000120	CaS13G000130
CaS13G000700	CaS13G000710
CaS13G000800	CaS13G000810
CaS13G000900	CaS13G000910
CaS13G001170	CaS13G001180
CaS13G001590	CaS13G001600
CaS13G001600	CaS13G001610
CaS13G001610	CaS13G001620
CaS13G002860	CaS13G002870
CaS13G003000	CaS13G003010
CaS13G003720	CaS13G003730
CaS13G004030	CaS13G004040
CaS13G004540	CaS13G004550
CaS13G005330	CaS13G005340
CaS13G005340	CaS13G005350
CaS13G005450	CaS13G005460
CaS13G005920	CaS13G005930
CaS13G005990	CaS13G006000
CaS13G006000	CaS13G006010
CaS13G006010	CaS13G006020
CaS13G006020	CaS13G006030
CaS13G006250	CaS13G006260
CaS13G008180	CaS13G008190
CaS13G008360	CaS13G008370
CaS13G008930	CaS13G008940
CaS13G011560	CaS13G011570
CaS13G011570	CaS13G011580
CaS13G014210	CaS13G014220
CaS13G014350	CaS13G014360
CaS13G014360	CaS13G014370
CaS13G014920	CaS13G014930
CaS13G015620	CaS13G015630
CaS13G018520	CaS13G018530
CaS13G022620	CaS13G022630
CaS13G023680	CaS13G023690
CaS13G025000	CaS13G025010
CaS13G025260	CaS13G025270
CaS13G026520	CaS13G026530
CaS13G027140	CaS13G027150
CaS13G029230	CaS13G029240
CaS13G030530	CaS13G030540
CaS13G030660	CaS13G030670
CaS13G031250	CaS13G031260
CaS13G032410	CaS13G032420
CaS14G000030	CaS14G000040
CaS14G000230	CaS14G000240
CaS14G001380	CaS14G001390
CaS14G001390	CaS14G001400
CaS14G001800	CaS14G001810
CaS14G001910	CaS14G001920
CaS14G002010	CaS14G002020
CaS14G002420	CaS14G002430
CaS14G002530	CaS14G002540
CaS14G003000	CaS14G003010
CaS14G003070	CaS14G003080
CaS14G003310	CaS14G003320
CaS14G004120	CaS14G004130
CaS14G004810	CaS14G004820
CaS14G005890	CaS14G005900
CaS14G006340	CaS14G006350
CaS14G007460	CaS14G007470
CaS14G007470	CaS14G007480
CaS14G007500	CaS14G007510
CaS14G007520	CaS14G007530
CaS14G007710	CaS14G007720
CaS14G008560	CaS14G008570
CaS14G008840	CaS14G008850
CaS14G009510	CaS14G009520
CaS14G009950	CaS14G009960
CaS14G010010	CaS14G010020
CaS14G010080	CaS14G010090
CaS14G010090	CaS14G010100
CaS14G010140	CaS14G010150
CaS14G010280	CaS14G010290
CaS14G010670	CaS14G010680
CaS14G013320	CaS14G013330
CaS14G013530	CaS14G013540
CaS14G013900	CaS14G013910
CaS14G014300	CaS14G014310
CaS14G014810	CaS14G014820
CaS14G014880	CaS14G014890
CaS14G016020	CaS14G016030
CaS14G016270	CaS14G016280
CaS14G016910	CaS14G016920
CaS14G017360	CaS14G017370
CaS14G017890	CaS14G017900
CaS14G017930	CaS14G017940
CaS14G018080	CaS14G018090
CaS14G018980	CaS14G018990
CaS14G019040	CaS14G019050
CaS14G019450	CaS14G019460
CaS14G019590	CaS14G019600
CaS14G019600	CaS14G019610
CaS14G019610	CaS14G019620
CaS14G019850	CaS14G019860
CaS14G019860	CaS14G019870
CaS14G020030	CaS14G020040
CaS14G021180	CaS14G021190
CaS14G021580	CaS14G021590
CaS14G021760	CaS14G021770
CaS14G021830	CaS14G021840
CaS14G021850	CaS14G021860
CaS14G021860	CaS14G021870
CaS14G022300	CaS14G022310
CaS14G022460	CaS14G022470
CaS14G024560	CaS14G024570
CaS14G024990	CaS14G025000
CaS14G029310	CaS14G029320
CaS14G030860	CaS14G030870
CaS14G031460	CaS14G031470
CaS14G031980	CaS14G031990
CaS14G031990	CaS14G032000
CaS14G032250	CaS14G032260
CaS14G032340	CaS14G032350
CaS14G032380	CaS14G032390
CaS14G032470	CaS14G032480
CaS14G032480	CaS14G032490
CaS14G032570	CaS14G032580
CaS14G032610	CaS14G032620
CaS14G032670	CaS14G032680
CaS14G033110	CaS14G033120
CaS15G001040	CaS15G001050
CaS15G001620	CaS15G001630
CaS15G001840	CaS15G001850
CaS15G002810	CaS15G002820
CaS15G006690	CaS15G006700
CaS15G006780	CaS15G006790
CaS15G007230	CaS15G007240
CaS15G007330	CaS15G007340
CaS15G008320	CaS15G008330
CaS15G011210	CaS15G011220
CaS15G013590	CaS15G013600
CaS15G016160	CaS15G016170
CaS15G017230	CaS15G017240
CaS15G018450	CaS15G018460
CaS15G018580	CaS15G018590
CaS15G019550	CaS15G019560
CaS15G020980	CaS15G020990
CaS15G021110	CaS15G021120
CaS15G021610	CaS15G021620
CaS15G021620	CaS15G021630
CaS15G022660	CaS15G022670
CaS15G024470	CaS15G024480
CaS15G024490	CaS15G024500
CaS15G024640	CaS15G024650
CaS15G025050	CaS15G025060
CaS15G025220	CaS15G025230
CaS15G025880	CaS15G025890
CaS15G026100	CaS15G026110
CaS15G026880	CaS15G026890
CaS15G026890	CaS15G026900
CaS15G026990	CaS15G027000
CaS15G027740	CaS15G027750
CaS15G027750	CaS15G027760
