# Supplementary material for: Multi-omics analysis of the co-expression features of specific neighboring gene pairs suggests an association with catechin regulation in Camellia sinensis
Source: Research Square preprint supplement (doi:10.21203/rs.3.rs-7249588/v1), 2025-08-19
Supplement: Supplementary file 2 [file 15916a6f08bcb8a2cce879f2.xlsx]

## Sheet: Sheet1
Supplementary table 1. Genomic locations of enhancers identified in this study
Chr	Star	End	ID
1	5102066	5102310	e1
1	7578307	7578547	e2
1	8931522	8931722	e3
1	10944714	10944956	e4
1	11707724	11707857	e5
1	13764921	13765213	e6
1	14956452	14956944	e7
1	16146505	16146804	e8
1	17433889	17434377	e9
1	17961289	17961480	e10
1	19176276	19176546	e11
1	19384962	19385185	e12
1	20588433	20588450	e13
1	21531956	21531966	e14
1	21975438	21975576	e15
1	22095722	22096001	e16
1	25436598	25436748	e17
1	25907107	25907245	e18
1	26756271	26756465	e19
1	26800807	26800826	e20
1	27715629	27715901	e21
1	27767009	27767292	e22
1	28186322	28186652	e23
1	29623457	29623749	e24
1	36360511	36360521	e25
1	38077453	38077523	e26
1	38651724	38651976	e27
1	40390579	40390813	e28
1	40598110	40598304	e29
1	45333934	45334199	e30
1	49362645	49362861	e31
1	50313992	50314234	e32
1	50631726	50632016	e33
1	51375026	51375295	e34
1	59727516	59727745	e35
1	61584911	61585002	e36
1	65165807	65165919	e37
1	66238329	66238802	e38
1	67955773	67956327	e39
1	73877614	73877859	e40
1	76508480	76508659	e41
1	76509115	76509457	e42
1	77008542	77008789	e43
1	78511993	78512109	e44
1	90623167	90623192	e45
1	92543090	92543201	e46
1	92697841	92698313	e47
1	92738229	92738359	e48
1	94429621	94429949	e49
1	95912645	95912922	e50
1	97549908	97550150	e51
1	97550615	97550920	e52
1	100293556	100293731	e53
1	101711799	101712019	e54
1	102389270	102389753	e55
1	103506992	103507268	e56
1	103665893	103666092	e57
1	104526435	104526597	e58
1	104559850	104559891	e59
1	110572952	110573264	e60
1	110702499	110702818	e61
1	112570764	112570898	e62
1	115104325	115104465	e63
1	119299343	119299537	e64
1	119345587	119345743	e65
1	121293686	121294060	e66
1	124252274	124252529	e67
1	124564155	124564164	e68
1	132756224	132756441	e69
1	133309609	133309710	e70
1	136526467	136526643	e71
1	145677788	145678066	e72
1	150094715	150094835	e73
1	152165414	152165641	e74
1	160644349	160644525	e75
1	166297927	166298011	e76
1	168790488	168791091	e77
1	169372749	169372887	e78
1	170952305	170952381	e79
1	171169541	171169924	e80
1	173358967	173359260	e81
1	175213810	175214251	e82
1	178886591	178886712	e83
1	188247582	188247708	e84
1	188640966	188641277	e85
1	197050476	197050834	e86
1	197055695	197055904	e87
1	198773381	198773474	e88
1	203345976	203346068	e89
1	204187520	204187580	e90
1	204438891	204439074	e91
1	205467046	205467262	e92
1	206579701	206579919	e93
1	208588432	208588671	e94
1	208588917	208589088	e95
1	209333801	209333958	e96
1	209776793	209777488	e97
1	219761025	219761088	e98
1	219861958	219862383	e99
1	228674437	228674721	e100
1	229620380	229620603	e101
1	229630545	229630766	e102
1	230166360	230166620	e103
1	230805253	230805415	e104
1	233303652	233303977	e105
1	235353308	235353666	e106
1	237033750	237033888	e107
1	237548934	237549246	e108
1	237942096	237942324	e109
1	238035269	238035468	e110
1	238302072	238302350	e111
1	240917214	240917358	e112
1	246603489	246603667	e113
1	247317778	247317994	e114
1	248046465	248046674	e115
1	251444857	251445335	e116
1	254023092	254023370	e117
1	254237768	254237893	e118
1	255999549	255999882	e119
1	256822399	256822485	e120
1	256845141	256845225	e121
1	258016511	258016801	e122
1	259291186	259291376	e123
1	259754890	259755097	e124
1	262685963	262686109	e125
1	263080140	263080278	e126
1	267649154	267649204	e127
1	268545895	268546044	e128
1	268599861	268600031	e129
1	268607846	268607945	e130
1	269924263	269924443	e131
1	270270705	270270774	e132
1	270665786	270665846	e133
10	689047	689218	e134
10	749585	749713	e135
10	2056113	2056228	e136
10	2659541	2659817	e137
10	3355033	3355264	e138
10	6981444	6981565	e139
10	7610357	7610556	e140
10	8605814	8605835	e141
10	15044459	15044671	e142
10	15244862	15244911	e143
10	15452138	15452531	e144
10	15628214	15628304	e145
10	16393909	16394553	e146
10	17778825	17779156	e147
10	19431799	19432466	e148
10	19494854	19494912	e149
10	19508668	19508911	e150
10	19598119	19598854	e151
10	22431217	22431233	e152
10	22431525	22431672	e153
10	24563234	24563508	e154
10	24868246	24868331	e155
10	27058287	27058968	e156
10	28387638	28387671	e157
10	29571812	29572079	e158
10	29585409	29585517	e159
10	30167331	30167691	e160
10	32469343	32469533	e161
10	34224036	34224165	e162
10	34541876	34542112	e163
10	34831137	34831424	e164
10	34832482	34832748	e165
10	38208154	38208162	e166
10	40820979	40821139	e167
10	42048795	42048996	e168
10	45810757	45810818	e169
10	45822587	45822822	e170
10	45867595	45867646	e171
10	46557600	46557795	e172
10	46658907	46658937	e173
10	49076202	49076285	e174
10	50650120	50650336	e175
10	56449480	56450361	e176
10	56664956	56665058	e177
10	56680512	56680741	e178
10	58649810	58649865	e179
10	60167501	60167673	e180
10	60412626	60412793	e181
10	63346447	63346671	e182
10	76449131	76449423	e183
10	77293875	77293951	e184
10	80148426	80148506	e185
10	84906651	84906920	e186
10	88054406	88054577	e187
10	88084870	88085082	e188
10	93306876	93307129	e189
10	99631133	99631409	e190
10	107803481	107803798	e191
10	109430094	109430372	e192
10	111001570	111001814	e193
10	114134143	114134192	e194
10	119467881	119467944	e195
10	123281566	123281729	e196
10	123558976	123559041	e197
10	125535564	125535768	e198
10	136826166	136826274	e199
10	149778904	149779207	e200
10	152324547	152324656	e201
10	152345772	152346116	e202
10	157953550	157953787	e203
10	158570510	158571081	e204
10	163346069	163346310	e205
10	163347934	163348108	e206
10	164506206	164506439	e207
10	166746731	166746916	e208
10	166868516	166868894	e209
10	168091626	168091864	e210
10	169190697	169190714	e211
10	171516444	171516728	e212
10	172503987	172504303	e213
10	172594940	172595463	e214
10	173767866	173768008	e215
10	174864950	174865266	e216
10	178593886	178594111	e217
10	179662583	179662657	e218
10	179675427	179675661	e219
10	180324798	180324948	e220
10	181031370	181031654	e221
10	182619341	182619354	e222
10	182879171	182879512	e223
10	186597837	186597997	e224
10	187408262	187408413	e225
10	187426696	187426783	e226
10	188518328	188518449	e227
10	189795997	189796048	e228
10	192966389	192966649	e229
10	194680639	194680821	e230
10	195152753	195153095	e231
10	198396546	198396826	e232
10	206097489	206097748	e233
10	208100940	208101066	e234
10	213071161	213071562	e235
10	214892324	214892516	e236
10	216047835	216048048	e237
10	216504433	216504851	e238
10	216510884	216511046	e239
11	2496410	2496692	e240
11	2587950	2588082	e241
11	12009731	12009878	e242
11	12413838	12414000	e243
11	15929686	15929786	e244
11	20695192	20695251	e245
11	32093923	32094114	e246
11	37701908	37702259	e247
11	37743186	37743261	e248
11	37762264	37762527	e249
11	39429318	39429335	e250
11	39897594	39897692	e251
11	41141435	41141531	e252
11	42827206	42827517	e253
11	44659590	44659735	e254
11	50526702	50527140	e255
11	51606390	51606441	e256
11	54815349	54815486	e257
11	59803502	59803579	e258
11	61697329	61697741	e259
11	65674081	65674275	e260
11	66038536	66038766	e261
11	66445244	66445506	e262
11	66505330	66505340	e263
11	66507217	66507275	e264
11	67214252	67214354	e265
11	68681439	68681652	e266
11	69491530	69491655	e267
11	73189963	73190092	e268
11	74790641	74790786	e269
11	74791169	74791254	e270
11	78797212	78797325	e271
11	79021856	79022282	e272
11	79022738	79022749	e273
11	79898494	79898623	e274
11	81058046	81058298	e275
11	81263322	81263501	e276
11	87133025	87133030	e277
11	88569663	88570041	e278
11	88636169	88636249	e279
11	89282188	89282434	e280
11	90828338	90828820	e281
11	93403719	93403907	e282
11	93989794	93989978	e283
11	94042612	94042877	e284
11	94232193	94232205	e285
11	96821231	96821348	e286
11	98645562	98645950	e287
11	98926976	98927045	e288
11	99282579	99282837	e289
11	99699564	99699712	e290
11	100142001	100142102	e291
11	100196791	100196795	e292
11	101749452	101749530	e293
11	101766453	101766666	e294
11	102429821	102429915	e295
11	103026524	103026789	e296
11	103028342	103028567	e297
11	103132493	103132567	e298
11	103263078	103263311	e299
11	104321660	104321930	e300
11	105377442	105377719	e301
11	105963844	105963974	e302
11	106026646	106026798	e303
11	106691759	106692100	e304
11	106717054	106717122	e305
11	107201333	107201472	e306
11	111018380	111018389	e307
11	122303941	122304261	e308
11	124155394	124155819	e309
11	124540919	124541228	e310
11	125824860	125825029	e311
11	126617662	126617878	e312
11	126635376	126635530	e313
11	126675656	126675727	e314
11	127359747	127359985	e315
11	127726148	127726322	e316
11	131312233	131312597	e317
11	133439225	133439236	e318
11	138277287	138277478	e319
11	139042596	139042818	e320
11	140513307	140513605	e321
11	145372151	145372277	e322
11	147636859	147637126	e323
11	147672237	147672428	e324
11	149898504	149898560	e325
11	150653919	150654019	e326
11	150713520	150713643	e327
11	151803657	151803948	e328
11	152304203	152304231	e329
11	152304488	152304549	e330
11	156336177	156336462	e331
11	156991879	156992069	e332
11	160167995	160168004	e333
11	163105059	163105122	e334
11	163145798	163146273	e335
11	163635104	163635393	e336
11	164078790	164079073	e337
11	164475074	164475187	e338
11	168319118	168319257	e339
11	169527747	169528012	e340
11	170812325	170812467	e341
11	170992296	170992488	e342
11	170993008	170993054	e343
11	171224218	171224406	e344
11	171636318	171636425	e345
11	172689508	172689849	e346
11	173086184	173086389	e347
11	173183079	173183258	e348
11	173189961	173189992	e349
11	173225553	173225810	e350
11	174387839	174388453	e351
11	175346234	175346706	e352
11	177093028	177093583	e353
11	179909429	179909660	e354
11	180655161	180655661	e355
11	183223409	183223650	e356
11	183764194	183764383	e357
11	186342740	186343199	e358
12	472804	473037	e359
12	1959451	1959628	e360
12	4152902	4153062	e361
12	5650194	5650372	e362
12	5832957	5833142	e363
12	6542849	6543054	e364
12	6676086	6676344	e365
12	8313292	8313841	e366
12	10596757	10596900	e367
12	11051369	11051521	e368
12	11126360	11126690	e369
12	19093369	19093638	e370
12	23530604	23530847	e371
12	30603093	30603183	e372
12	35093588	35094096	e373
12	36300161	36300627	e374
12	36317237	36317321	e375
12	36432058	36432419	e376
12	36449430	36449819	e377
12	36455159	36455421	e378
12	36469556	36469968	e379
12	39808752	39808950	e380
12	46871031	46871234	e381
12	47830638	47830861	e382
12	47895688	47895762	e383
12	48831623	48832159	e384
12	49394655	49394695	e385
12	50537243	50537559	e386
12	53130268	53130277	e387
12	56838307	56838695	e388
12	56879868	56879956	e389
12	57536148	57536481	e390
12	58685184	58685257	e391
12	60050002	60050301	e392
12	70359582	70359592	e393
12	70360129	70360223	e394
12	71451781	71451890	e395
12	71452207	71452352	e396
12	74074964	74075000	e397
12	78199834	78199992	e398
12	78220474	78220702	e399
12	85754694	85755129	e400
12	90160102	90160109	e401
12	96328579	96328725	e402
12	96667551	96667857	e403
12	100253308	100253466	e404
12	102337142	102337378	e405
12	111001322	111001740	e406
12	112490490	112490746	e407
12	120357187	120357313	e408
12	125661171	125661339	e409
12	128075673	128075933	e410
12	133105739	133105920	e411
12	148983014	148983172	e412
12	158992869	158993083	e413
12	170499466	170499563	e414
12	180194839	180195057	e415
12	180387428	180387452	e416
12	183911748	183911966	e417
12	186300522	186300610	e418
12	186324328	186324356	e419
12	187899559	187899910	e420
12	189884380	189884663	e421
12	190001952	190002306	e422
12	191428919	191428969	e423
12	191432772	191432981	e424
12	199697116	199697480	e425
12	200139159	200139419	e426
12	201156414	201156705	e427
12	201458386	201458626	e428
12	201880543	201880644	e429
12	201917893	201918138	e430
12	203268181	203268384	e431
12	203912501	203913008	e432
12	204303477	204303704	e433
12	207353384	207353632	e434
12	209729362	209729521	e435
12	210287726	210287864	e436
12	210357730	210358186	e437
12	211701936	211702306	e438
12	212365507	212365679	e439
12	212699265	212699396	e440
12	212819631	212819833	e441
12	212921741	212922132	e442
12	212960525	212961030	e443
12	216758433	216758715	e444
12	217612305	217612615	e445
12	226741602	226741658	e446
12	231826167	231826382	e447
12	241305792	241305883	e448
12	242090304	242090440	e449
12	246171199	246171353	e450
12	249434369	249434542	e451
12	252431475	252431719	e452
12	252835117	252836029	e453
13	16960	17093	e454
13	357484	357611	e455
13	2086893	2087040	e456
13	2328412	2328754	e457
13	4872283	4872553	e458
13	5056779	5057002	e459
13	6498408	6498719	e460
13	7242653	7243055	e461
13	7371599	7371694	e462
13	10553406	10553643	e463
13	11338299	11338399	e464
13	13503434	13503519	e465
13	13510115	13510619	e466
13	14260805	14260953	e467
13	15476366	15476636	e468
13	15495184	15495211	e469
13	18062539	18062923	e470
13	18426597	18426834	e471
13	22356338	22356343	e472
13	24606557	24606620	e473
13	28996666	28996675	e474
13	41876665	41876764	e475
13	43856423	43856759	e476
13	47667299	47667492	e477
13	48083165	48083377	e478
13	55988108	55988161	e479
13	56051438	56051673	e480
13	61212955	61213239	e481
13	61301382	61301534	e482
13	64424332	64424617	e483
13	70056810	70056914	e484
13	70057372	70057667	e485
13	71549381	71549742	e486
13	74499610	74499996	e487
13	74500502	74500758	e488
13	76860609	76860766	e489
13	76926582	76926621	e490
13	78121437	78121454	e491
13	80124662	80125287	e492
13	81362868	81363053	e493
13	82960319	82960323	e494
13	86021933	86022114	e495
13	90192803	90192852	e496
13	93634894	93635310	e497
13	93703662	93703750	e498
13	93704205	93704417	e499
13	94744720	94744919	e500
13	105301755	105302060	e501
13	106812935	106813180	e502
13	110464616	110464772	e503
13	110550530	110550734	e504
13	110667415	110667670	e505
13	114207079	114207095	e506
13	119574898	119575143	e507
13	123372144	123372426	e508
13	126391246	126391425	e509
13	132676819	132677206	e510
13	132937566	132937622	e511
13	132983885	132983904	e512
13	132984197	132984257	e513
13	136039107	136039339	e514
13	149726654	149726750	e515
13	153717479	153717511	e516
13	153903947	153903992	e517
13	158963620	158963651	e518
13	160294105	160294240	e519
13	160300801	160301180	e520
13	168424758	168425136	e521
13	171824225	171824245	e522
13	175612941	175613214	e523
13	177791761	177792069	e524
13	181111189	181111256	e525
13	185243939	185244015	e526
13	186788239	186788290	e527
13	188712407	188712597	e528
13	189905902	189906080	e529
13	193244380	193244822	e530
13	193619863	193620069	e531
13	195928363	195928370	e532
13	196291115	196291263	e533
13	199816283	199816580	e534
13	200314184	200314303	e535
13	200922581	200923247	e536
13	201300361	201300627	e537
13	202442087	202442387	e538
13	203010105	203010125	e539
13	204668355	204668516	e540
13	204826965	204827277	e541
13	209504521	209504707	e542
13	212576380	212576673	e543
13	212633301	212633612	e544
13	217661786	217661860	e545
13	223119511	223119801	e546
13	224545704	224545939	e547
13	227612039	227612274	e548
13	228685923	228686134	e549
13	228692944	228693217	e550
13	228744585	228744667	e551
13	231107591	231107766	e552
13	240853250	240853325	e553
13	240858921	240859093	e554
13	240887363	240887444	e555
13	243894638	243894824	e556
13	245395249	245395258	e557
13	246466393	246466615	e558
13	247548821	247549020	e559
13	247571019	247571483	e560
13	247994457	247994522	e561
13	248493675	248493887	e562
13	249646898	249646977	e563
13	250102942	250103300	e564
13	251282485	251282787	e565
13	252310235	252310372	e566
13	252376874	252377053	e567
13	253277229	253277301	e568
13	253314465	253314837	e569
13	254023550	254023724	e570
13	255588455	255588461	e571
13	255661980	255662282	e572
13	257945334	257945348	e573
14	565696	566214	e574
14	1944012	1944362	e575
14	2013630	2013644	e576
14	3293402	3293619	e577
14	6177002	6177064	e578
14	6339868	6340013	e579
14	7338549	7338593	e580
14	7938502	7938738	e581
14	10852239	10852517	e582
14	12929205	12929384	e583
14	14379031	14379287	e584
14	14490574	14490721	e585
14	14545423	14545627	e586
14	16074962	16075022	e587
14	16319161	16319387	e588
14	16393676	16393798	e589
14	17860205	17860504	e590
14	18880745	18880932	e591
14	19246619	19246815	e592
14	20399741	20399959	e593
14	20562290	20562652	e594
14	21973656	21974073	e595
14	24688415	24688707	e596
14	24690406	24690554	e597
14	25483835	25483993	e598
14	25894327	25894657	e599
14	27508023	27508106	e600
14	27716515	27716675	e601
14	28154446	28154994	e602
14	28370630	28370721	e603
14	28841306	28841590	e604
14	28917955	28918333	e605
14	29054161	29054523	e606
14	31209669	31209814	e607
14	31540295	31540422	e608
14	33041965	33042064	e609
14	33075166	33075367	e610
14	36035565	36035711	e611
14	38167688	38167923	e612
14	42108172	42108441	e613
14	42128756	42128824	e614
14	42171800	42171901	e615
14	44694268	44694330	e616
14	45100189	45100369	e617
14	45227479	45227598	e618
14	45475956	45476412	e619
14	46245719	46246069	e620
14	46247094	46247522	e621
14	50046235	50046332	e622
14	55419627	55419915	e623
14	57890842	57891166	e624
14	60494013	60494389	e625
14	61449046	61449235	e626
14	63619950	63620299	e627
14	64364027	64364336	e628
14	64365688	64365757	e629
14	66146876	66146958	e630
14	67687677	67687891	e631
14	67880055	67880178	e632
14	68149957	68150223	e633
14	71853088	71853371	e634
14	72794927	72795090	e635
14	74202895	74203265	e636
14	74297999	74298258	e637
14	75559494	75559744	e638
14	75643388	75643644	e639
14	75787731	75787875	e640
14	77071075	77071307	e641
14	79695169	79695441	e642
14	79710974	79711080	e643
14	80681514	80681712	e644
14	82470724	82471070	e645
14	83179272	83179727	e646
14	84065278	84065517	e647
14	84230469	84230531	e648
14	86435733	86436045	e649
14	93792806	93792904	e650
14	105150533	105150545	e651
14	106441346	106441574	e652
14	107280578	107280973	e653
14	109343155	109343541	e654
14	113673538	113674029	e655
14	116588302	116588617	e656
14	117455360	117455563	e657
14	123842736	123842982	e658
14	124341203	124341381	e659
14	130955189	130955261	e660
14	132144730	132145137	e661
14	144305461	144305581	e662
14	145482481	145482822	e663
14	148405814	148405959	e664
14	148807388	148807604	e665
14	150253241	150253387	e666
14	159779877	159780248	e667
14	160448018	160448298	e668
14	160526426	160526724	e669
14	171520585	171520832	e670
14	175423519	175423699	e671
14	175437466	175437758	e672
14	175471771	175472314	e673
14	175889497	175889682	e674
14	175997626	175997829	e675
14	178644857	178645562	e676
14	178765057	178765488	e677
14	181945180	181945301	e678
14	182088282	182088404	e679
14	182150723	182151066	e680
14	183167754	183167794	e681
14	194236203	194236336	e682
14	204890847	204891011	e683
14	222590356	222590506	e684
14	222947494	222947666	e685
14	225787718	225788023	e686
14	226441200	226441247	e687
14	226584417	226584554	e688
14	229968011	229968108	e689
14	237082309	237082392	e690
14	237523821	237524251	e691
14	237525453	237525670	e692
14	238121714	238121802	e693
14	238159022	238159300	e694
14	238196177	238196299	e695
14	238224093	238224690	e696
14	240010955	240011057	e697
14	243593066	243593339	e698
14	243593554	243593848	e699
14	251493637	251493883	e700
14	251561839	251562231	e701
14	254872138	254872358	e702
14	255432816	255433345	e703
14	260771148	260771418	e704
15	1799952	1800087	e705
15	4165118	4165221	e706
15	6238481	6238741	e707
15	6240029	6240517	e708
15	11230902	11231034	e709
15	11279618	11279797	e710
15	11498191	11498425	e711
15	12347070	12347321	e712
15	12666480	12666851	e713
15	12780731	12780833	e714
15	13970956	13971231	e715
15	15810471	15810631	e716
15	20655442	20655641	e717
15	32067124	32067304	e718
15	40925544	40925576	e719
15	43540971	43541158	e720
15	44147041	44147273	e721
15	44842631	44842725	e722
15	46966701	46966913	e723
15	48865739	48865991	e724
15	49821181	49821297	e725
15	59681848	59682111	e726
15	65258956	65259479	e727
15	67968656	67968826	e728
15	68780244	68780488	e729
15	69074261	69074653	e730
15	76440545	76440695	e731
15	79063316	79063585	e732
15	79825272	79825429	e733
15	93333330	93333442	e734
15	93410063	93410173	e735
15	96066028	96066464	e736
15	96111999	96112186	e737
15	96340525	96340668	e738
15	105531132	105532099	e739
15	110296204	110296512	e740
15	110309993	110310198	e741
15	112167277	112167391	e742
15	116007724	116007967	e743
15	118379841	118379999	e744
15	118666895	118667198	e745
15	121067940	121068152	e746
15	121798015	121798542	e747
15	124234187	124234457	e748
15	126334943	126335192	e749
15	130419814	130420236	e750
15	130476212	130476303	e751
15	131508971	131509344	e752
15	131952853	131952939	e753
15	131954971	131955282	e754
15	140328388	140328650	e755
15	140417238	140417274	e756
15	140648345	140648496	e757
15	154050725	154051245	e758
15	156253605	156253971	e759
15	174446163	174446369	e760
15	174588712	174589390	e761
15	174596616	174596724	e762
15	178211067	178211241	e763
15	179747296	179747541	e764
15	180227915	180228111	e765
15	181999108	181999278	e766
15	187566225	187566280	e767
15	188976176	188976285	e768
15	191001629	191001822	e769
15	192020917	192021065	e770
15	192079042	192079177	e771
15	193366226	193366514	e772
15	193672734	193672812	e773
15	193673919	193674152	e774
15	194676328	194676396	e775
15	198207084	198207292	e776
15	200314371	200314664	e777
15	201115385	201115414	e778
15	202674074	202674503	e779
15	203547719	203547926	e780
15	203769645	203770008	e781
15	205890751	205891031	e782
15	207863603	207863893	e783
15	213776873	213776895	e784
15	214634411	214634891	e785
15	214804739	214804882	e786
15	214902225	214902735	e787
15	215504329	215504639	e788
15	215506078	215506421	e789
15	215637520	215638174	e790
15	215904132	215904282	e791
15	217872225	217872540	e792
15	219418268	219418333	e793
15	219428733	219429013	e794
15	219751018	219751197	e795
15	220952791	220953035	e796
15	221530882	221531143	e797
15	221570974	221571235	e798
15	222146929	222146979	e799
15	222491563	222491576	e800
15	223337081	223337217	e801
15	223864550	223864561	e802
15	223967219	223967542	e803
15	223968262	223968498	e804
15	224513712	224513906	e805
2	1076274	1076403	e806
2	1348847	1349101	e807
2	2364546	2364900	e808
2	6439991	6440174	e809
2	9363434	9363439	e810
2	9395173	9395182	e811
2	10798312	10798581	e812
2	16943387	16943747	e813
2	20141078	20141198	e814
2	21150188	21150333	e815
2	21944299	21944424	e816
2	26708722	26709007	e817
2	30214247	30214411	e818
2	30373522	30373699	e819
2	34767692	34767804	e820
2	36146373	36146488	e821
2	36820840	36820863	e822
2	36824831	36825280	e823
2	37171633	37171802	e824
2	37260670	37261124	e825
2	41238336	41238450	e826
2	41924335	41924392	e827
2	47977414	47977486	e828
2	51480655	51480964	e829
2	58208139	58208662	e830
2	58484735	58484885	e831
2	60719770	60720149	e832
2	60824194	60824341	e833
2	61325365	61325535	e834
2	61418864	61419155	e835
2	63782280	63782356	e836
2	64037357	64037677	e837
2	65063279	65063503	e838
2	65065612	65065824	e839
2	65650785	65650961	e840
2	72799821	72800009	e841
2	73505309	73505614	e842
2	83396648	83396791	e843
2	83579145	83579262	e844
2	84107493	84107673	e845
2	85970431	85970647	e846
2	86697447	86697652	e847
2	90274445	90274807	e848
2	91048038	91048563	e849
2	108063430	108063503	e850
2	108997215	108997446	e851
2	111855349	111855525	e852
2	114488264	114488538	e853
2	127195008	127195498	e854
2	132632901	132633201	e855
2	135998811	135998897	e856
2	139917854	139918000	e857
2	146058256	146058449	e858
2	146059242	146059374	e859
2	148311423	148311490	e860
2	155273285	155273583	e861
2	165425454	165425466	e862
2	165662550	165662677	e863
2	165703321	165703689	e864
2	166249617	166249770	e865
2	172965468	172965472	e866
2	172966435	172967105	e867
2	173127825	173127953	e868
2	173539602	173539725	e869
2	174517602	174517739	e870
2	175865565	175865609	e871
2	178675430	178675801	e872
2	180273202	180273291	e873
2	180575370	180575779	e874
2	180969861	180970341	e875
2	182031292	182031369	e876
2	185238511	185238583	e877
2	185542058	185542520	e878
2	185698527	185698748	e879
2	190889171	190889456	e880
2	191127030	191127335	e881
2	194490826	194490961	e882
2	195577981	195578089	e883
2	197707357	197707508	e884
2	198836338	198836351	e885
2	198995948	198995967	e886
2	199293887	199293935	e887
2	199827663	199827930	e888
2	199942128	199942412	e889
2	202737143	202737199	e890
2	203613688	203614258	e891
2	203629735	203629895	e892
2	204414859	204415338	e893
2	206855677	206855843	e894
2	206856409	206856595	e895
2	207293674	207293770	e896
2	207371319	207371650	e897
2	208967599	208967600	e898
3	1595262	1595272	e899
3	2029074	2029233	e900
3	2186091	2186235	e901
3	2279810	2280229	e902
3	2450671	2450812	e903
3	3631903	3632023	e904
3	4318519	4318542	e905
3	5250891	5251261	e906
3	6252568	6252772	e907
3	7017571	7017861	e908
3	10503889	10504191	e909
3	11287693	11287963	e910
3	12187636	12188069	e911
3	23220106	23220319	e912
3	26243488	26243725	e913
3	26860422	26860725	e914
3	27105884	27106036	e915
3	29740204	29740281	e916
3	30638033	30638295	e917
3	34369511	34369943	e918
3	34570142	34570307	e919
3	35333317	35333452	e920
3	35430177	35430311	e921
3	38769837	38770058	e922
3	42229872	42230076	e923
3	48670542	48670657	e924
3	49967661	49967748	e925
3	52067936	52067938	e926
3	53347366	53347525	e927
3	53402331	53402548	e928
3	58933783	58934168	e929
3	60449956	60450013	e930
3	71178707	71179184	e931
3	72077548	72077837	e932
3	77356872	77356960	e933
3	84538866	84539086	e934
3	93355704	93355976	e935
3	99394542	99394997	e936
3	101352502	101352911	e937
3	101397083	101397112	e938
3	116142122	116142137	e939
3	116292263	116292418	e940
3	117096503	117096836	e941
3	118002916	118003322	e942
3	119587278	119587456	e943
3	123999420	123999664	e944
3	125601500	125601729	e945
3	126364223	126364350	e946
3	126855554	126855707	e947
3	127292173	127292220	e948
3	129394129	129394868	e949
3	129541068	129541424	e950
3	129560771	129560840	e951
3	130586195	130586305	e952
3	130854040	130854297	e953
3	131545267	131545581	e954
3	138229994	138230221	e955
3	139794990	139795436	e956
3	140040876	140040899	e957
3	141798391	141798903	e958
3	142521827	142522019	e959
3	144351223	144351503	e960
3	144446613	144446758	e961
3	144470656	144470902	e962
3	146784600	146784862	e963
3	146785900	146786144	e964
3	147456163	147456602	e965
3	147614163	147614423	e966
3	147832981	147833774	e967
3	148123976	148124267	e968
3	148175291	148175632	e969
3	148260872	148261095	e970
3	148262885	148263041	e971
3	148321733	148321808	e972
3	148347943	148347987	e973
3	148464604	148464835	e974
3	148534158	148534257	e975
3	148615596	148615837	e976
3	149000078	149000577	e977
3	150526451	150526718	e978
3	150527403	150527669	e979
3	150747918	150748392	e980
3	150955382	150955513	e981
3	151119495	151119923	e982
3	152443214	152443216	e983
3	153524908	153524971	e984
4	468792	468878	e985
4	4609521	4609798	e986
4	6506574	6506691	e987
4	11812829	11812843	e988
4	17302774	17303122	e989
4	17886748	17887168	e990
4	18153463	18153692	e991
4	20215095	20215324	e992
4	20404885	20404966	e993
4	22417943	22418139	e994
4	22430797	22430804	e995
4	22498455	22498755	e996
4	23171882	23171885	e997
4	27155479	27155714	e998
4	30880363	30880542	e999
4	32115088	32115106	e1000
4	33186109	33186278	e1001
4	34114127	34114459	e1002
4	39514833	39515000	e1003
4	39596833	39597724	e1004
4	43043821	43044070	e1005
4	50537428	50537453	e1006
4	50886132	50886251	e1007
4	53797259	53797300	e1008
4	61183987	61184175	e1009
4	63015220	63015464	e1010
4	63145868	63146004	e1011
4	63146411	63146711	e1012
4	63862070	63862299	e1013
4	65505217	65505536	e1014
4	65505977	65505996	e1015
4	67967565	67967615	e1016
4	68023952	68024218	e1017
4	78055767	78055773	e1018
4	78229788	78230394	e1019
4	78863820	78863996	e1020
4	79817044	79817093	e1021
4	80411610	80411903	e1022
4	83928607	83928905	e1023
4	84015311	84015524	e1024
4	85160283	85160545	e1025
4	85425582	85425909	e1026
4	87597041	87597306	e1027
4	94461962	94462528	e1028
4	95563316	95563622	e1029
4	95576285	95576740	e1030
4	96164114	96164358	e1031
4	100346752	100346804	e1032
4	100472326	100472418	e1033
4	101550439	101551479	e1034
4	104327977	104328079	e1035
4	104600648	104600806	e1036
4	104619341	104619395	e1037
4	104619628	104619900	e1038
4	105492123	105492161	e1039
4	106071371	106071644	e1040
4	106355168	106355328	e1041
4	115984962	115985173	e1042
4	125128811	125128943	e1043
4	125942112	125942362	e1044
4	126388888	126389304	e1045
4	129337177	129337389	e1046
4	131942620	131942807	e1047
4	135032225	135032226	e1048
4	136722930	136723439	e1049
4	136832515	136832932	e1050
4	137925741	137926008	e1051
4	144958488	144958887	e1052
4	152444766	152445006	e1053
4	152475433	152475682	e1054
4	152524950	152524955	e1055
4	152538485	152538517	e1056
4	152933213	152933315	e1057
4	168827212	168827402	e1058
4	175114379	175114520	e1059
4	175550264	175550377	e1060
4	178361151	178361436	e1061
4	182055952	182056180	e1062
4	182057689	182057821	e1063
4	182352208	182352591	e1064
4	183355528	183355712	e1065
4	188360417	188360443	e1066
4	188718053	188718497	e1067
4	189309156	189309338	e1068
4	192573953	192574030	e1069
4	192688750	192688809	e1070
4	192747312	192747554	e1071
4	192786836	192787145	e1072
4	195476408	195476432	e1073
4	196895276	196895507	e1074
4	199288897	199288980	e1075
4	199809742	199809852	e1076
4	199854136	199854493	e1077
4	200458208	200458477	e1078
4	202410983	202411449	e1079
4	205792494	205792680	e1080
4	205825935	205826629	e1081
4	208622514	208622722	e1082
4	208938952	208939310	e1083
4	209000003	209000278	e1084
4	210050025	210050240	e1085
4	211998407	211998871	e1086
4	213796329	213796728	e1087
4	214512738	214512813	e1088
4	214971374	214971485	e1089
4	219675735	219675913	e1090
4	219798232	219798332	e1091
4	220755104	220755528	e1092
4	220882618	220882896	e1093
4	220925764	220926028	e1094
4	222791221	222791297	e1095
4	223437017	223437089	e1096
4	223560672	223560886	e1097
4	223561925	223562233	e1098
4	225353680	225353716	e1099
4	225587231	225587280	e1100
4	225672091	225672494	e1101
4	226876934	226876938	e1102
4	227145024	227145081	e1103
4	227255057	227255150	e1104
4	227650282	227650643	e1105
4	229159775	229160598	e1106
4	229935366	229935417	e1107
4	230270936	230271142	e1108
5	1336656	1337224	e1109
5	1337776	1338157	e1110
5	1338430	1338459	e1111
5	2599731	2599739	e1112
5	2611351	2611443	e1113
5	3713318	3713495	e1114
5	4034986	4035007	e1115
5	4318855	4319053	e1116
5	4337993	4338319	e1117
5	4451196	4451600	e1118
5	4507644	4507703	e1119
5	4555097	4555139	e1120
5	5664823	5665187	e1121
5	6344040	6344374	e1122
5	9082431	9082611	e1123
5	9887919	9888020	e1124
5	13146593	13146809	e1125
5	14914560	14914847	e1126
5	16189796	16190074	e1127
5	16918657	16918933	e1128
5	19825142	19825530	e1129
5	20816501	20816639	e1130
5	21318929	21318972	e1131
5	21870615	21870633	e1132
5	21873521	21873640	e1133
5	22025982	22026384	e1134
5	24880883	24881150	e1135
5	25274645	25274769	e1136
5	27395139	27395279	e1137
5	27481289	27481452	e1138
5	27691118	27691464	e1139
5	28395634	28395793	e1140
5	28444134	28444154	e1141
5	28771594	28771739	e1142
5	28967622	28967705	e1143
5	29007427	29007503	e1144
5	29319816	29319869	e1145
5	29373348	29373722	e1146
5	31580049	31580217	e1147
5	31771872	31772022	e1148
5	31865733	31865939	e1149
5	31964544	31964756	e1150
5	32773102	32773368	e1151
5	33050787	33050824	e1152
5	33179776	33180086	e1153
5	33180682	33180980	e1154
5	35052100	35052446	e1155
5	35679872	35679992	e1156
5	36137355	36137715	e1157
5	37332235	37332301	e1158
5	37714443	37714940	e1159
5	40609127	40609413	e1160
5	41768126	41768771	e1161
5	42761384	42761618	e1162
5	44644939	44645102	e1163
5	44813492	44813754	e1164
5	46465940	46466225	e1165
5	50926897	50927267	e1166
5	50969403	50969788	e1167
5	51061856	51062112	e1168
5	51128054	51128435	e1169
5	53596276	53596359	e1170
5	55253950	55254212	e1171
5	55289535	55289608	e1172
5	56130668	56130783	e1173
5	57880999	57881169	e1174
5	58548329	58548413	e1175
5	58594023	58594484	e1176
5	58976760	58976875	e1177
5	61684156	61684231	e1178
5	68716093	68716201	e1179
5	68722918	68723171	e1180
5	69260993	69261119	e1181
5	69423584	69424211	e1182
5	70152413	70152641	e1183
5	70581188	70581288	e1184
5	70762211	70762290	e1185
5	79213917	79214138	e1186
5	80011427	80011724	e1187
5	80552680	80552800	e1188
5	81598264	81598510	e1189
5	83674658	83674908	e1190
5	84065259	84065325	e1191
5	85162547	85162809	e1192
5	87894688	87894699	e1193
5	89118024	89118368	e1194
5	89223469	89223542	e1195
5	91932551	91932596	e1196
5	97084837	97084896	e1197
5	97662606	97662615	e1198
5	97981652	97981939	e1199
5	101821706	101821827	e1200
5	104106496	104106719	e1201
5	104427056	104427305	e1202
5	104582253	104582386	e1203
5	112359170	112359199	e1204
5	112665687	112666074	e1205
5	115268437	115268544	e1206
5	116530195	116530415	e1207
5	121791919	121792144	e1208
5	123627844	123628042	e1209
5	126449740	126449971	e1210
5	127081275	127081330	e1211
5	128284407	128284649	e1212
5	128514968	128515023	e1213
5	130725670	130725785	e1214
5	132484953	132485091	e1215
5	134361691	134361912	e1216
5	134371223	134371847	e1217
5	134535821	134536029	e1218
5	136350035	136350167	e1219
5	140504118	140504341	e1220
5	144995348	144995473	e1221
5	150240160	150240378	e1222
5	153701811	153701922	e1223
5	153949800	153950027	e1224
5	154048834	154049034	e1225
5	162797521	162797705	e1226
5	165214987	165215243	e1227
5	169065655	169066031	e1228
5	169746676	169746733	e1229
5	176324253	176324407	e1230
5	181543188	181543442	e1231
5	188110819	188111086	e1232
5	194576335	194576447	e1233
5	194971638	194972062	e1234
5	197349922	197350281	e1235
5	198357653	198357884	e1236
5	203383216	203383473	e1237
5	206041719	206041853	e1238
5	210010852	210011099	e1239
5	215551387	215551678	e1240
5	216427453	216427839	e1241
5	216445341	216445507	e1242
5	217102854	217102993	e1243
5	219894321	219894764	e1244
5	221417530	221417891	e1245
5	223401535	223401809	e1246
5	224118069	224118173	e1247
5	224441601	224442063	e1248
5	224487883	224488183	e1249
5	227569226	227569263	e1250
5	227715368	227715528	e1251
5	228786886	228787168	e1252
5	228983463	228983893	e1253
5	231318994	231319201	e1254
5	232532508	232532568	e1255
5	236463108	236463451	e1256
5	236556418	236556648	e1257
5	237318279	237318574	e1258
5	239785924	239786197	e1259
5	239951780	239951985	e1260
5	241692364	241692409	e1261
5	248850754	248851134	e1262
5	248872282	248872730	e1263
5	249733966	249734105	e1264
5	250816842	250817073	e1265
5	254881435	254881663	e1266
5	255002859	255003045	e1267
5	257448469	257448776	e1268
5	257703929	257704169	e1269
5	257820956	257821136	e1270
5	257869929	257869967	e1271
5	259211918	259212033	e1272
5	261434396	261434558	e1273
5	262258808	262258827	e1274
5	262356381	262357004	e1275
5	266113007	266113405	e1276
5	267140736	267140913	e1277
5	267512854	267512987	e1278
5	269457121	269457238	e1279
5	269803670	269803883	e1280
5	270242768	270243011	e1281
5	270335759	270335951	e1282
5	270506090	270506251	e1283
5	272151579	272151978	e1284
5	272178160	272178409	e1285
5	274500156	274500527	e1286
5	279084278	279084283	e1287
5	281445996	281446438	e1288
5	281631212	281631367	e1289
5	281631843	281632073	e1290
5	282243281	282243588	e1291
5	282429677	282429787	e1292
5	282464037	282464202	e1293
5	283825486	283825727	e1294
5	284470713	284471009	e1295
6	220002	220075	e1296
6	2149380	2149553	e1297
6	2364881	2365177	e1298
6	3430282	3430359	e1299
6	6441442	6441566	e1300
6	14481556	14481689	e1301
6	14482142	14482408	e1302
6	14551787	14551942	e1303
6	15750774	15751287	e1304
6	16581796	16581914	e1305
6	20520118	20520406	e1306
6	20606033	20606297	e1307
6	23058477	23058934	e1308
6	23311383	23311519	e1309
6	23395137	23395382	e1310
6	25695552	25695661	e1311
6	25826708	25826739	e1312
6	27532915	27533020	e1313
6	27670859	27670962	e1314
6	28504912	28505097	e1315
6	32456809	32456938	e1316
6	32479593	32479729	e1317
6	33377796	33377985	e1318
6	34898969	34899284	e1319
6	34918541	34919270	e1320
6	42856526	42856858	e1321
6	43864514	43864729	e1322
6	45952790	45952978	e1323
6	51006919	51007349	e1324
6	52678958	52679121	e1325
6	56385512	56385880	e1326
6	63105012	63105231	e1327
6	63252447	63252682	e1328
6	68890476	68890853	e1329
6	71349776	71350329	e1330
6	92860488	92860568	e1331
6	98013995	98014154	e1332
6	98040190	98040321	e1333
6	98127210	98127539	e1334
6	101765359	101765366	e1335
6	106821480	106821514	e1336
6	107104472	107104551	e1337
6	107868825	107869072	e1338
6	109064444	109064856	e1339
6	109306002	109306615	e1340
6	110229921	110230054	e1341
6	110460660	110460732	e1342
6	110469424	110469999	e1343
6	121304340	121304670	e1344
6	124668989	124669138	e1345
6	125714113	125714425	e1346
6	130677810	130677893	e1347
6	132527038	132527149	e1348
6	135514785	135514907	e1349
6	135654503	135654923	e1350
6	137133956	137134371	e1351
6	137918777	137918992	e1352
6	138741401	138741901	e1353
6	140003264	140003805	e1354
6	141731186	141731498	e1355
6	141936320	141936678	e1356
6	142782751	142782855	e1357
6	146989484	146989757	e1358
6	149103753	149104141	e1359
6	152409546	152409694	e1360
6	153190044	153190191	e1361
6	154455877	154456108	e1362
6	154583406	154583718	e1363
6	156018644	156019036	e1364
6	158297196	158297283	e1365
6	162444944	162445198	e1366
6	165654734	165654946	e1367
6	165662262	165662409	e1368
6	167214567	167214830	e1369
6	170743702	170743870	e1370
6	177176102	177176201	e1371
6	178432177	178432234	e1372
6	178506884	178507312	e1373
6	179816002	179816292	e1374
6	179898669	179898688	e1375
6	180261990	180262021	e1376
6	180279632	180279978	e1377
6	180312349	180312373	e1378
6	181348953	181349255	e1379
6	181354706	181354992	e1380
6	181445940	181446144	e1381
6	182984484	182984843	e1382
6	182993770	182993909	e1383
6	183213444	183213872	e1384
6	185223596	185223833	e1385
6	185355194	185355673	e1386
6	185397236	185397518	e1387
6	185399187	185399430	e1388
6	185525388	185525627	e1389
6	187406123	187406369	e1390
6	191956124	191956337	e1391
6	192492936	192493138	e1392
6	194878271	194878396	e1393
6	195438954	195439019	e1394
6	197976183	197976539	e1395
6	203985014	203985094	e1396
6	204004113	204004547	e1397
6	205322353	205322806	e1398
6	207507929	207508272	e1399
6	208844675	208844776	e1400
6	209414192	209414371	e1401
6	210827244	210827362	e1402
6	213977839	213977899	e1403
6	214231924	214232287	e1404
6	216157691	216157924	e1405
6	217691369	217691633	e1406
6	219902915	219903142	e1407
6	219949662	219949935	e1408
6	220355514	220355737	e1409
6	222469109	222469279	e1410
6	222664617	222664791	e1411
6	222673025	222673077	e1412
6	222695060	222695177	e1413
6	222710855	222710984	e1414
6	225439072	225439208	e1415
6	227151824	227152098	e1416
6	228087820	228088232	e1417
6	228321364	228321367	e1418
6	228348625	228348849	e1419
6	233439482	233439521	e1420
6	234177300	234177750	e1421
6	234194045	234194054	e1422
6	235261554	235261647	e1423
6	235467629	235468205	e1424
6	236016711	236016970	e1425
6	236700793	236700971	e1426
6	236701694	236701985	e1427
6	238139510	238139839	e1428
6	238226202	238226403	e1429
6	238480479	238480869	e1430
6	240575251	240575432	e1431
6	241791637	241792005	e1432
6	246888045	246888242	e1433
6	247003240	247003244	e1434
6	247537698	247538203	e1435
6	249812812	249813088	e1436
6	250293511	250293786	e1437
6	251120412	251120619	e1438
6	251177416	251177653	e1439
6	251477345	251477774	e1440
6	251783054	251783338	e1441
6	251952568	251952589	e1442
6	252262834	252263244	e1443
6	253278529	253278736	e1444
6	253544496	253544711	e1445
7	522252	522641	e1446
7	968945	969002	e1447
7	1086024	1087132	e1448
7	5026866	5027070	e1449
7	5130453	5130454	e1450
7	6377824	6377892	e1451
7	6382734	6382867	e1452
7	7162331	7162600	e1453
7	8676724	8676948	e1454
7	8859432	8859579	e1455
7	9824350	9824735	e1456
7	9859029	9859238	e1457
7	10420103	10420392	e1458
7	10811210	10811314	e1459
7	11676360	11676746	e1460
7	11997703	11997884	e1461
7	13257010	13257241	e1462
7	13808730	13808834	e1463
7	15902010	15902226	e1464
7	16624035	16624122	e1465
7	17782991	17782997	e1466
7	18757699	18757789	e1467
7	19109163	19109276	e1468
7	19614282	19614375	e1469
7	20041444	20041472	e1470
7	20459273	20459390	e1471
7	20511954	20512474	e1472
7	24691140	24691355	e1473
7	24696356	24696759	e1474
7	25424471	25425070	e1475
7	27389439	27389673	e1476
7	29670133	29670731	e1477
7	34068967	34069322	e1478
7	36875284	36875556	e1479
7	37010509	37010569	e1480
7	38925212	38925452	e1481
7	41455190	41455225	e1482
7	42414519	42414728	e1483
7	43861642	43861727	e1484
7	44568079	44568409	e1485
7	53804848	53805194	e1486
7	57778515	57778831	e1487
7	57844149	57844266	e1488
7	58130329	58130904	e1489
7	58308612	58308725	e1490
7	58608464	58608530	e1491
7	63294261	63294390	e1492
7	63502439	63502617	e1493
7	64271652	64272031	e1494
7	65340740	65340743	e1495
7	65341686	65341971	e1496
7	68338830	68339073	e1497
7	69295295	69295443	e1498
7	69455289	69455332	e1499
7	69455667	69455793	e1500
7	74100692	74100996	e1501
7	77203133	77203552	e1502
7	77213844	77213906	e1503
7	77603754	77604105	e1504
7	79796885	79797048	e1505
7	80043710	80043818	e1506
7	82322841	82323309	e1507
7	84074858	84074970	e1508
7	94025649	94025664	e1509
7	96100862	96100905	e1510
7	104079156	104079500	e1511
7	104141305	104141366	e1512
7	107816342	107816770	e1513
7	107875667	107876709	e1514
7	109743529	109743776	e1515
7	109766958	109767247	e1516
7	115130352	115130453	e1517
7	117433787	117433910	e1518
7	118502584	118503009	e1519
7	125474064	125474084	e1520
7	125534770	125534974	e1521
7	134201040	134201461	e1522
7	135816472	135816725	e1523
7	137864672	137864989	e1524
7	146664300	146664571	e1525
7	146808825	146809092	e1526
7	151470740	151470808	e1527
7	152134651	152134756	e1528
7	154635685	154635986	e1529
7	158293498	158293705	e1530
7	170003715	170003885	e1531
7	182509876	182510195	e1532
7	183723332	183723561	e1533
7	184272401	184272627	e1534
7	184290334	184290925	e1535
7	184382888	184382919	e1536
7	185043262	185043494	e1537
7	187054821	187054872	e1538
7	187158050	187158173	e1539
7	187441173	187441370	e1540
8	10515188	10515376	e1541
8	11329250	11329504	e1542
8	14528645	14528700	e1543
8	22162029	22162331	e1544
8	25196163	25196504	e1545
8	26725258	26725307	e1546
8	42672340	42672443	e1547
8	42678625	42678678	e1548
8	42679952	42680177	e1549
8	43169961	43170008	e1550
8	44052415	44052658	e1551
8	48978041	48978119	e1552
8	49051802	49052137	e1553
8	49999685	49999930	e1554
8	52717653	52717821	e1555
8	58261287	58261618	e1556
8	58401339	58401478	e1557
8	60790082	60790252	e1558
8	64479535	64479757	e1559
8	76265796	76265902	e1560
8	76369146	76369413	e1561
8	76597516	76597737	e1562
8	77139504	77139830	e1563
8	77721280	77721577	e1564
8	79047827	79047844	e1565
8	79165661	79165897	e1566
8	79352870	79352995	e1567
8	80297317	80297395	e1568
8	80593117	80593357	e1569
8	87447130	87447516	e1570
8	90636071	90636389	e1571
8	93320060	93320122	e1572
8	95559552	95559645	e1573
8	95733349	95733797	e1574
8	96174630	96174700	e1575
8	97922632	97922658	e1576
8	98020078	98020104	e1577
8	100781997	100782267	e1578
8	102269299	102269795	e1579
8	103412729	103412979	e1580
8	103623801	103624211	e1581
8	104040103	104040408	e1582
8	106510963	106511397	e1583
8	107439001	107439475	e1584
8	108062279	108062336	e1585
8	108501089	108501196	e1586
8	109787672	109787883	e1587
8	110934830	110935069	e1588
8	111300282	111300721	e1589
8	111570634	111570707	e1590
8	113241534	113241778	e1591
8	113328990	113329170	e1592
8	114418383	114418467	e1593
8	115248828	115248989	e1594
8	116684344	116684411	e1595
8	117797603	117797836	e1596
8	122650280	122650317	e1597
8	122783096	122783304	e1598
8	122935550	122935901	e1599
8	124999678	124999893	e1600
8	125829940	125830091	e1601
8	133873233	133873324	e1602
8	134747766	134748162	e1603
8	136074086	136074119	e1604
8	136080866	136080912	e1605
8	146699321	146699503	e1606
8	150071923	150071981	e1607
8	152730712	152730829	e1608
8	157766230	157766318	e1609
8	157854179	157854773	e1610
8	159016090	159016326	e1611
8	159106190	159106483	e1612
8	159921464	159921490	e1613
8	161176597	161176842	e1614
8	168713903	168714211	e1615
9	1310579	1310738	e1616
9	1580531	1580567	e1617
9	3120962	3121216	e1618
9	4779559	4779734	e1619
9	9364414	9364678	e1620
9	11317007	11317270	e1621
9	16928051	16928116	e1622
9	18758894	18758896	e1623
9	34763299	34763398	e1624
9	34990564	34990726	e1625
9	35357382	35357399	e1626
9	35674518	35674848	e1627
9	35809731	35809979	e1628
9	36141559	36141820	e1629
9	36923301	36923306	e1630
9	36923807	36924540	e1631
9	37540783	37541053	e1632
9	37541445	37542040	e1633
9	38177804	38177907	e1634
9	42681226	42681511	e1635
9	42743292	42743697	e1636
9	42962186	42962263	e1637
9	49261487	49261964	e1638
9	49290443	49290758	e1639
9	49593508	49593665	e1640
9	51381394	51381508	e1641
9	52369620	52369639	e1642
9	54859342	54859618	e1643
9	55345568	55345701	e1644
9	55498366	55498430	e1645
9	55612862	55612938	e1646
9	58162950	58163282	e1647
9	58398380	58398661	e1648
9	61381771	61381998	e1649
9	61622520	61622536	e1650
9	61819918	61820118	e1651
9	62562179	62562193	e1652
9	64256723	64256806	e1653
9	64497956	64498139	e1654
9	64743031	64743263	e1655
9	71579244	71579431	e1656
9	71694373	71694618	e1657
9	71763373	71763429	e1658
9	71763690	71763846	e1659
9	71771522	71771962	e1660
9	72009506	72009915	e1661
9	72946603	72947164	e1662
9	73351395	73351638	e1663
9	73582297	73582639	e1664
9	74422651	74422954	e1665
9	75101233	75101498	e1666
9	75807994	75808465	e1667
9	76421904	76422008	e1668
9	76993714	76994204	e1669
9	80320653	80321061	e1670
9	80425959	80426106	e1671
9	83643298	83643714	e1672
9	83821323	83821541	e1673
9	87902916	87903181	e1674
9	88648233	88648439	e1675
9	90219891	90220228	e1676
9	92560907	92560945	e1677
9	92979187	92979453	e1678
9	94570768	94571268	e1679
9	94710795	94710914	e1680
9	95088021	95088091	e1681
9	95342349	95342537	e1682
9	95342775	95343025	e1683
9	95891976	95892161	e1684
9	96454061	96454603	e1685
9	98342989	98343074	e1686
9	99342636	99342773	e1687
9	99515693	99515943	e1688
9	113790145	113790403	e1689
9	119814153	119814358	e1690
9	125291189	125291425	e1691
9	129971010	129971317	e1692
9	133003015	133003128	e1693
9	133449569	133449958	e1694
9	133813941	133813985	e1695
9	138850579	138851296	e1696
9	140992106	140992253	e1697
9	141252168	141252445	e1698
9	142114046	142114251	e1699
9	147928053	147928380	e1700
9	147964052	147964083	e1701
9	148185234	148185385	e1702
9	150268167	150268372	e1703
9	150570398	150570606	e1704
9	153335822	153336080	e1705
9	153432466	153432806	e1706
