# Supplementary material for: Multi-omics analysis of the co-expression features of specific neighboring gene pairs suggests an association with catechin regulation in Camellia sinensis
Source: Research Square preprint supplement (doi:10.21203/rs.3.rs-7249588/v1), 2025-08-19
Supplement: Supplementary file 3 [file 57638b0dfe51fbcef7ecc499.xlsx]

## Sheet: Sheet1
Supplementary table 3. Sources of transcriptomic and epigenomics data used in this study
LibraryStrategy	BioProject	ScientificName	SampleName	Published	References
RNA-Seq	PRJNA381277	Camellia sinensis(YK10)	Flower	2017.04	Xia EH, Zhang HB, Sheng J, Li K, Zhang QJ, Kim C, et al. The Tea Tree Genome Provides Insights into Tea Flavor and Independent Evolution of Caffeine Biosynthesis. Mol Plant. 2017;10(6):866–77.
RNA-Seq	PRJNA381277	Camellia sinensis(YK10)	Flower_bud	2017.04	Xia EH, Zhang HB, Sheng J, Li K, Zhang QJ, Kim C, et al. The Tea Tree Genome Provides Insights into Tea Flavor and Independent Evolution of Caffeine Biosynthesis. Mol Plant. 2017;10(6):866–77.
RNA-Seq	PRJNA381277	Camellia sinensis(YK10)	Leaf	2017.04	Xia EH, Zhang HB, Sheng J, Li K, Zhang QJ, Kim C, et al. The Tea Tree Genome Provides Insights into Tea Flavor and Independent Evolution of Caffeine Biosynthesis. Mol Plant. 2017;10(6):866–77.
RNA-Seq	PRJNA381277	Camellia sinensis(YK10)	Seed	2017.04	Xia EH, Zhang HB, Sheng J, Li K, Zhang QJ, Kim C, et al. The Tea Tree Genome Provides Insights into Tea Flavor and Independent Evolution of Caffeine Biosynthesis. Mol Plant. 2017;10(6):866–77.
RNA-Seq	PRJNA381277	Camellia sinensis(YK10)	Seeding	2017.04	Xia EH, Zhang HB, Sheng J, Li K, Zhang QJ, Kim C, et al. The Tea Tree Genome Provides Insights into Tea Flavor and Independent Evolution of Caffeine Biosynthesis. Mol Plant. 2017;10(6):866–77.
RNA-Seq	PRJNA381277	Camellia sinensis(YK10)	Stem	2017.04	Xia EH, Zhang HB, Sheng J, Li K, Zhang QJ, Kim C, et al. The Tea Tree Genome Provides Insights into Tea Flavor and Independent Evolution of Caffeine Biosynthesis. Mol Plant. 2017;10(6):866–77.
RNA-Seq	PRJNA381277	Camellia sinensis(YK10)	Tender	2017.04	Xia EH, Zhang HB, Sheng J, Li K, Zhang QJ, Kim C, et al. The Tea Tree Genome Provides Insights into Tea Flavor and Independent Evolution of Caffeine Biosynthesis. Mol Plant. 2017;10(6):866–77.
RNA-Seq	PRJNA524304	Camellia sinensis(YK10)	Shoots (one bud and two leaves)	2022.11	Liu ZW, Shi XY, Duan SM, Nian B, Chen LJ, Zhang GH, Lv CY, Ma Y, Zhao M. Multiomics analysis of the mechanisms behind flavonoid differences between purple and green tender shoots of Camellia sinensis var. assamica. G3 (Bethesda). 2023;13(2):jkac297.
RNA-Seq	PRJCA009753	Camellia sinensis(SCZ)	Shoots (one bud and two leaves)	2023.11	Ting GA, Zheng Y, Shan J. Differential metabolites and their transcriptional regulation in seven major tea cultivars (Camellia sinensis) in China. J Integr Agric. 2023;22(11):3346–3363.
RNA-Seq	PRJCA009753	Camellia sinensis(SCZ)	Shoots (one bud and two leaves)	2023.11	Ting GA, Zheng Y, Shan J. Differential metabolites and their transcriptional regulation in seven major tea cultivars (Camellia sinensis) in China. J Integr Agric. 2023;22(11):3346–3363.
RNA-Seq	PRJCA009753	Camellia sinensis(SCZ)	Shoots (one bud and two leaves)	2023.11	Ting GA, Zheng Y, Shan J. Differential metabolites and their transcriptional regulation in seven major tea cultivars (Camellia sinensis) in China. J Integr Agric. 2023;22(11):3346–3363.
ATAC-seq	PRJCA017759	Camellia sinensis(TGY-1)	Leaf	2023.12	Kong W, Yu J, Yang J, Zhang Y, Zhang X. The high-resolution three-dimensional (3D) chromatin map of the tea plant (Camellia sinensis). Hortic Res. 2023;10(10):uhad179.
ATAC-seq	PRJCA017759	Camellia sinensis(TGY-2)	Leaf	2023.12	Kong W, Yu J, Yang J, Zhang Y, Zhang X. The high-resolution three-dimensional (3D) chromatin map of the tea plant (Camellia sinensis). Hortic Res. 2023;10(10):uhad179.
Chip-seq	PRJCA017759	Camellia sinensis((TGY-1-Input)	Leaf	2023.12	Kong W, Yu J, Yang J, Zhang Y, Zhang X. The high-resolution three-dimensional (3D) chromatin map of the tea plant (Camellia sinensis). Hortic Res. 2023;10(10):uhad179.
Chip-seq	PRJCA017759	Camellia sinensis((TGY-2-Input)	Leaf	2023.12	Kong W, Yu J, Yang J, Zhang Y, Zhang X. The high-resolution three-dimensional (3D) chromatin map of the tea plant (Camellia sinensis). Hortic Res. 2023;10(10):uhad179.
Chip-seq	PRJCA017759	Camellia sinensis((TGY-1-H3K27ac)	Leaf	2023.12	Kong W, Yu J, Yang J, Zhang Y, Zhang X. The high-resolution three-dimensional (3D) chromatin map of the tea plant (Camellia sinensis). Hortic Res. 2023;10(10):uhad179.
Chip-seq	PRJCA017759	Camellia sinensis((TGY-2-H3K27ac)	Leaf	2023.12	Kong W, Yu J, Yang J, Zhang Y, Zhang X. The high-resolution three-dimensional (3D) chromatin map of the tea plant (Camellia sinensis). Hortic Res. 2023;10(10):uhad179.
Hi-C	PRJCA017765	Camellia sinensis(TGY-1)	Leaf	2023.12	Kong W, Yu J, Yang J, Zhang Y, Zhang X. The high-resolution three-dimensional (3D) chromatin map of the tea plant (Camellia sinensis). Hortic Res. 2023;10(10):uhad179.
Hi-C	PRJCA017765	Camellia sinensis(TGY-2)	Leaf	2023.12	Kong W, Yu J, Yang J, Zhang Y, Zhang X. The high-resolution three-dimensional (3D) chromatin map of the tea plant (Camellia sinensis). Hortic Res. 2023;10(10):uhad179.
Hi-C	PRJCA017765	Camellia sinensis(TGY-3)	Leaf	2023.12	Kong W, Yu J, Yang J, Zhang Y, Zhang X. The high-resolution three-dimensional (3D) chromatin map of the tea plant (Camellia sinensis). Hortic Res. 2023;10(10):uhad179.
Hi-C	PRJCA017765	Camellia sinensis(TGY-4)	Leaf	2023.12	Kong W, Yu J, Yang J, Zhang Y, Zhang X. The high-resolution three-dimensional (3D) chromatin map of the tea plant (Camellia sinensis). Hortic Res. 2023;10(10):uhad179.
