# Supplementary material for: Multi-omics analysis of the co-expression features of specific neighboring gene pairs suggests an association with catechin regulation in Camellia sinensis
Source: Research Square preprint supplement (doi:10.21203/rs.3.rs-7249588/v1), 2025-08-19
Supplement: Supplementary file 4 [file 8b6879dce665b39af32da4c8.pdf]

Chr1:21,525,403-21,538,519

e14

13 kb

21,526 kb

21,528 kb

21,530 kb

21,532 kb

21,534 kb

21,536 kb

21,538 kb

Genes

CaS01G003680.1

ATAC-1

ATAC-1\_peak352

ATAC-1\_peak353

ATAC-2

ATAC-2\_peaks326

H3K27ac-1

H3K27ac-1\_peaks758

H3K27ac-1\_peaks760

H3K27ac-1\_peaks761

H3K27ac-2

H3K27ac-2\_peak573

H3K27ac-2\_peak574

H3K27ac-2\_peak575
