# Supplementary material for: Multi-omics analysis of the co-expression features of specific neighboring gene pairs suggests an association with catechin regulation in Camellia sinensis
Source: Research Square preprint supplement (doi:10.21203/rs.3.rs-7249588/v1), 2025-08-19
Supplement: Supplementary file 4 [file ef974e14c67a8c4122309019.xlsx]

## Sheet: Sheet1
Supplementary table 4. Summary of predicted transcription factors
GeneID	TF_Family
CaS13G000210	RAV
CaS14G030350	RAV
CaS01G000340	HSF
CaS01G000460	GRAS
CaS01G001850	GATA
CaS01G003620	GRAS
CaS01G003620	GRAS
CaS01G004320	WRKY
CaS01G004320	WRKY
CaS01G004550	NF-YB
CaS01G004740	GRAS
CaS01G004920	NAC
CaS01G005210	TCP
CaS01G006400	NF-YA
CaS01G006530	NAC
CaS01G006660	bZIP
CaS01G006660	bZIP
CaS01G006760	Trihelix
CaS01G006890	GATA
CaS01G007300	Trihelix
CaS01G007590	bZIP
CaS01G007600	bZIP
CaS01G008190	FAR1
CaS01G008640	NAC
CaS01G008650	NAC
CaS01G008870	HSF
CaS01G009230	LBD
CaS01G009270	Dof
CaS01G011110	Dof
CaS01G012940	BBR-BPC
CaS01G013060	GRAS
CaS01G013190	bHLH
CaS01G013380	bHLH
CaS01G013380	bHLH
CaS01G013420	WRKY
CaS01G013720	LBD
CaS01G014070	bZIP
CaS01G014130	FAR1
CaS01G015070	FAR1
CaS01G015080	FAR1
CaS01G015360	bHLH
CaS01G016150	LBD
CaS01G016640	bHLH
CaS01G017010	bHLH
CaS01G017890	bHLH
CaS01G018330	GRAS
CaS01G018890	NF-YC
CaS01G019080	Dof
CaS01G019750	bHLH
CaS01G021610	TCP
CaS01G022370	NAC
CaS01G022690	NAC
CaS01G026210	FAR1
CaS01G026400	WRKY
CaS01G026520	NAC
CaS01G026600	NF-YC
CaS01G026890	NAC
CaS01G029450	Dof
CaS01G029730	GATA
CaS01G029940	bHLH
CaS01G030080	NAC
CaS01G030120	bHLH
CaS01G030290	Trihelix
CaS01G030290	Trihelix
CaS01G030530	bHLH
CaS01G031010	bZIP
CaS01G031510	CAMTA
CaS01G031700	FAR1
CaS01G031930	WRKY
CaS01G032100	NAC
CaS01G032120	bHLH
CaS01G032140	GRAS
CaS01G032300	HSF
CaS01G032840	Trihelix
CaS01G033200	Dof
CaS01G033350	Dof
CaS01G033750	BES1
CaS01G033790	bZIP
CaS01G034270	bZIP
CaS01G034870	BBR-BPC
CaS02G000650	bHLH
CaS02G002430	bZIP
CaS02G002600	bZIP
CaS02G002820	bHLH
CaS02G002920	bZIP
CaS02G003870	bZIP
CaS02G004100	NF-YA
CaS02G004140	NF-YA
CaS02G004320	NAC
CaS02G004660	bZIP
CaS02G004880	bZIP
CaS02G004970	GRAS
CaS02G005300	WRKY
CaS02G006090	WRKY
CaS02G006200	GRAS
CaS02G006310	bHLH
CaS02G006670	Trihelix
CaS02G006820	bHLH
CaS02G006950	bZIP
CaS02G007530	GRAS
CaS02G008580	FAR1
CaS02G008640	GRAS
CaS02G009110	WRKY
CaS02G009620	WRKY
CaS02G009970	Nin-like
CaS02G009970	Nin-like
CaS02G010320	S1Fa-like
CaS02G011650	Trihelix
CaS02G011730	GATA
CaS02G011890	bHLH
CaS02G013100	FAR1
CaS02G013100	FAR1
CaS02G013160	HSF
CaS02G013210	Trihelix
CaS02G013590	GRAS
CaS02G013600	GRAS
CaS02G013830	WRKY
CaS02G015010	NAC
CaS02G015270	SBP
CaS02G016700	NAC
CaS02G016760	bZIP
CaS02G017540	EIL
CaS02G017590	E2F/DP
CaS02G018310	GRAS
CaS02G018930	GRAS
CaS02G020450	NF-YB
CaS02G020590	NAC
CaS02G020740	bHLH
CaS02G021950	NF-YB
CaS02G021950	NF-YB
CaS02G024470	WRKY
CaS02G025000	bHLH
CaS02G025190	SBP
CaS02G025240	CAMTA
CaS02G025300	SBP
CaS02G025330	WRKY
CaS02G025450	WRKY
CaS02G025470	SBP
CaS02G025600	NAC
CaS02G025650	LBD
CaS02G025780	Trihelix
CaS03G001180	bZIP
CaS03G001880	TCP
CaS03G002370	bHLH
CaS03G002630	SBP
CaS03G002790	Dof
CaS03G002820	bHLH
CaS03G002910	TCP
CaS03G003310	bHLH
CaS03G003390	Dof
CaS03G004070	bZIP
CaS03G004260	Dof
CaS03G004280	NAC
CaS03G004410	NAC
CaS03G004440	Dof
CaS03G004500	WRKY
CaS03G004730	WRKY
CaS03G004810	TCP
CaS03G004990	Nin-like
CaS03G004990	Nin-like
CaS03G005070	WRKY
CaS03G005070	WRKY
CaS03G005460	LBD
CaS03G005570	bHLH
CaS03G005810	TCP
CaS03G005940	E2F/DP
CaS03G006600	bHLH
CaS03G006650	bHLH
CaS03G009030	SBP
CaS03G009360	FAR1
CaS03G009640	NAC
CaS03G009960	bHLH
CaS03G010060	bHLH
CaS03G010080	bHLH
CaS03G010180	Trihelix
CaS03G012250	WRKY
CaS03G013150	TCP
CaS03G013160	WRKY
CaS03G013930	FAR1
CaS03G013930	FAR1
CaS03G014000	GATA
CaS03G014030	FAR1
CaS03G014440	bHLH
CaS03G015540	CPP
CaS03G015750	FAR1
CaS03G015770	GATA
CaS03G016110	bHLH
CaS03G016150	bHLH
CaS03G016760	NF-YA
CaS03G017110	GRAS
CaS03G017880	Trihelix
CaS03G017940	GATA
CaS04G000450	bHLH
CaS04G001010	Trihelix
CaS04G001400	NAC
CaS04G001660	Nin-like
CaS04G001690	Nin-like
CaS04G001760	SBP
CaS04G002090	TCP
CaS04G002100	BBR-BPC
CaS04G002900	bZIP
CaS04G002960	bZIP
CaS04G003250	bHLH
CaS04G003260	bHLH
CaS04G003490	NAC
CaS04G003490	NAC
CaS04G003520	BES1
CaS04G003990	WRKY
CaS04G004590	BES1
CaS04G004620	NAC
CaS04G004620	NAC
CaS04G005160	Dof
CaS04G005420	LBD
CaS04G005950	GATA
CaS04G006430	GRAS
CaS04G007570	bHLH
CaS04G008000	bHLH
CaS04G008100	GATA
CaS04G008110	GATA
CaS04G008250	GATA
CaS04G008420	SBP
CaS04G008430	WRKY
CaS04G009480	SRS
CaS04G010680	bZIP
CaS04G011270	FAR1
CaS04G012320	Dof
CaS04G012360	Trihelix
CaS04G012460	bZIP
CaS04G012560	Dof
CaS04G012840	GRAS
CaS04G014300	NAC
CaS04G015250	EIL
CaS04G016130	HSF
CaS04G016240	bHLH
CaS04G016730	Whirly
CaS04G017340	bHLH
CaS04G017530	Whirly
CaS04G018190	bZIP
CaS04G018480	GRAS
CaS04G018610	bZIP
CaS04G019000	FAR1
CaS04G019030	FAR1
CaS04G019700	FAR1
CaS04G019900	bHLH
CaS04G020370	bZIP
CaS04G020370	bZIP
CaS04G020370	bZIP
CaS04G020370	bZIP
CaS04G021020	HSF
CaS04G021960	bHLH
CaS04G021960	bHLH
CaS04G023060	E2F/DP
CaS04G023150	NAC
CaS04G023340	NAC
CaS04G023350	Dof
CaS04G023350	Dof
CaS04G023520	NAC
CaS04G024480	bHLH
CaS04G025150	CPP
CaS04G025390	bZIP
CaS04G025620	bHLH
CaS04G026300	FAR1
CaS04G026490	SBP
CaS04G027440	FAR1
CaS04G027490	NF-YB
CaS04G027820	bZIP
CaS04G027820	bZIP
CaS04G027850	CAMTA
CaS04G028070	WRKY
CaS05G000060	NAC
CaS05G000060	NAC
CaS05G000310	bHLH
CaS05G001090	FAR1
CaS05G001340	NAC
CaS05G002360	E2F/DP
CaS05G002860	FAR1
CaS05G003370	ZF-HD
CaS05G004540	TCP
CaS05G004790	TCP
CaS05G005350	LBD
CaS05G005790	GRAS
CaS05G005800	bZIP
CaS05G006680	WRKY
CaS05G007460	GRAS
CaS05G007470	LBD
CaS05G008450	bHLH
CaS05G008600	bHLH
CaS05G008630	bHLH
CaS05G008970	bHLH
CaS05G009020	GATA
CaS05G009470	ZF-HD
CaS05G010160	GATA
CaS05G010280	BBR-BPC
CaS05G010300	NAC
CaS05G011490	NAC
CaS05G012910	NAC
CaS05G012930	bZIP
CaS05G013310	NAC
CaS05G014930	bZIP
CaS05G015600	Nin-like
CaS05G015870	bHLH
CaS05G016370	bHLH
CaS05G016650	Dof
CaS05G016790	bHLH
CaS05G017000	GATA
CaS05G017130	GeBP
CaS05G017280	GeBP
CaS05G017330	bHLH
CaS05G018030	WRKY
CaS05G018030	WRKY
CaS05G018360	Trihelix
CaS05G019460	HSF
CaS05G019590	HSF
CaS05G019590	HSF
CaS05G019850	LBD
CaS05G020340	NAC
CaS05G021880	WRKY
CaS05G021890	bHLH
CaS05G022930	HSF
CaS05G023140	bZIP
CaS05G023390	NAC
CaS05G023720	NAC
CaS05G024020	bHLH
CaS05G024750	bHLH
CaS05G026080	NAC
CaS05G026180	NF-YB
CaS05G027600	GRAS
CaS05G027700	SBP
CaS05G027710	WRKY
CaS05G027760	TCP
CaS05G028540	WRKY
CaS05G028760	Dof
CaS05G028960	LBD
CaS05G029320	bHLH
CaS05G030860	bHLH
CaS05G030980	Nin-like
CaS05G031250	bHLH
CaS05G033150	NF-YB
CaS05G033150	NF-YB
CaS05G033150	NF-YB
CaS05G033210	LBD
CaS05G033240	NF-YB
CaS05G033240	NF-YB
CaS05G033240	NF-YB
CaS05G033300	LBD
CaS05G033380	Trihelix
CaS05G033490	GATA
CaS05G033850	NAC
CaS05G033860	NAC
CaS05G034240	FAR1
CaS05G034340	FAR1
CaS05G036890	LBD
CaS05G037310	TCP
CaS06G000200	Nin-like
CaS06G000450	NAC
CaS06G000500	NAC
CaS06G000850	bHLH
CaS06G001090	bHLH
CaS06G001160	bZIP
CaS06G001180	bZIP
CaS06G001200	bZIP
CaS06G002240	WRKY
CaS06G002580	BBR-BPC
CaS06G002590	bZIP
CaS06G002630	bZIP
CaS06G002650	BBR-BPC
CaS06G002730	bHLH
CaS06G002750	bHLH
CaS06G002890	NF-YA
CaS06G002930	NAC
CaS06G003540	GATA
CaS06G004540	bHLH
CaS06G004560	bHLH
CaS06G005700	bZIP
CaS06G005700	bZIP
CaS06G006330	Dof
CaS06G006360	ZF-HD
CaS06G006600	Dof
CaS06G007250	bHLH
CaS06G007820	Nin-like
CaS06G007820	Nin-like
CaS06G007880	GATA
CaS06G008440	TCP
CaS06G008510	NF-YA
CaS06G009000	FAR1
CaS06G009020	FAR1
CaS06G009020	FAR1
CaS06G010740	bHLH
CaS06G011900	WRKY
CaS06G011900	WRKY
CaS06G011970	Trihelix
CaS06G012010	WRKY
CaS06G012010	WRKY
CaS06G012470	ZF-HD
CaS06G012590	SBP
CaS06G012650	Nin-like
CaS06G012680	Nin-like
CaS06G012950	SBP
CaS06G012990	GATA
CaS06G013030	bHLH
CaS06G013340	WRKY
CaS06G013410	WRKY
CaS06G013750	GRAS
CaS06G014070	LBD
CaS06G014100	LBD
CaS06G015240	CPP
CaS06G015810	bHLH
CaS06G016020	Dof
CaS06G016160	bHLH
CaS06G016930	Nin-like
CaS06G017790	ZF-HD
CaS06G017870	WRKY
CaS06G017940	WRKY
CaS06G018000	bHLH
CaS06G018770	NF-YC
CaS06G018790	Trihelix
CaS06G019030	NAC
CaS06G019160	bZIP
CaS06G019530	bHLH
CaS06G019570	LBD
CaS06G019710	WRKY
CaS06G019810	WRKY
CaS06G019910	bZIP
CaS06G019910	bZIP
CaS06G020050	WRKY
CaS06G020050	WRKY
CaS06G020160	WRKY
CaS06G020160	WRKY
CaS06G020380	GeBP
CaS06G020470	CPP
CaS06G020500	Trihelix
CaS06G020880	bHLH
CaS06G021450	NAC
CaS06G022820	GRAS
CaS06G023440	HSF
CaS06G023540	bZIP
CaS06G023540	bZIP
CaS06G023540	bZIP
CaS06G023540	bZIP
CaS06G023540	bZIP
CaS06G023540	bZIP
CaS06G024310	CPP
CaS06G024970	NAC
CaS06G025090	HRT-like
CaS06G025680	bZIP
CaS06G026380	GRAS
CaS06G026460	GRAS
CaS06G026610	WRKY
CaS06G027370	FAR1
CaS06G028710	bHLH
CaS06G029140	bZIP
CaS06G029140	bZIP
CaS06G029280	NAC
CaS06G029440	bHLH
CaS06G029860	Dof
CaS06G030000	NAC
CaS06G030300	WRKY
CaS06G030450	NAC
CaS06G030550	bHLH
CaS06G030850	NAC
CaS06G030900	Dof
CaS06G031010	ZF-HD
CaS06G031140	TCP
CaS06G031330	bHLH
CaS06G031360	Whirly
CaS06G032160	bHLH
CaS06G032310	Dof
CaS06G034220	NF-YC
CaS06G034300	NAC
CaS06G034460	WRKY
CaS06G034540	SBP
CaS06G034630	NF-YC
CaS06G035130	GRAS
CaS06G035190	Trihelix
CaS07G000290	bHLH
CaS07G000290	bHLH
CaS07G000410	Nin-like
CaS07G000970	WRKY
CaS07G001290	Nin-like
CaS07G001580	WRKY
CaS07G001990	bHLH
CaS07G002220	CAMTA
CaS07G002690	GRAS
CaS07G002810	TCP
CaS07G003630	YABBY
CaS07G003640	NAC
CaS07G004090	bHLH
CaS07G005110	NAC
CaS07G005300	bHLH
CaS07G005540	bHLH
CaS07G005940	bHLH
CaS07G006030	bZIP
CaS07G006330	bHLH
CaS07G006910	NAC
CaS07G007040	BBR-BPC
CaS07G007780	GATA
CaS07G007910	VOZ
CaS07G008370	GATA
CaS07G008450	NAC
CaS07G009270	bZIP
CaS07G009350	CPP
CaS07G009350	CPP
CaS07G009620	GATA
CaS07G009870	NF-YC
CaS07G010030	bHLH
CaS07G010400	NAC
CaS07G010960	Dof
CaS07G011380	FAR1
CaS07G011380	FAR1
CaS07G011760	HSF
CaS07G012150	TCP
CaS07G012160	ZF-HD
CaS07G012190	Dof
CaS07G012470	NAC
CaS07G012510	bZIP
CaS07G012510	bZIP
CaS07G012510	bZIP
CaS07G012510	bZIP
CaS07G012510	bZIP
CaS07G012510	bZIP
CaS07G012520	bZIP
CaS07G012520	bZIP
CaS07G012520	bZIP
CaS07G012520	bZIP
CaS07G012520	bZIP
CaS07G012520	bZIP
CaS07G012530	bZIP
CaS07G012530	bZIP
CaS07G012530	bZIP
CaS07G012530	bZIP
CaS07G012530	bZIP
CaS07G012530	bZIP
CaS07G012770	WRKY
CaS07G013100	NAC
CaS07G014260	bHLH
CaS07G014310	FAR1
CaS07G014320	FAR1
CaS07G014780	GRAS
CaS07G014810	bHLH
CaS07G014810	bHLH
CaS07G016460	HSF
CaS07G017280	BBR-BPC
CaS07G017280	BBR-BPC
CaS07G017290	BBR-BPC
CaS07G017290	BBR-BPC
CaS07G017810	BBR-BPC
CaS07G017810	BBR-BPC
CaS07G017820	BBR-BPC
CaS07G017820	BBR-BPC
CaS07G018570	NF-YA
CaS07G018570	NF-YA
CaS07G018570	NF-YA
CaS07G018760	bHLH
CaS07G019430	NAC
CaS07G019590	WRKY
CaS07G019890	TCP
CaS07G020250	E2F/DP
CaS08G000480	bHLH
CaS08G000480	bHLH
CaS08G001310	bHLH
CaS08G001310	bHLH
CaS08G001380	bHLH
CaS08G001950	NF-YA
CaS08G002440	HSF
CaS08G002640	HSF
CaS08G002740	bHLH
CaS08G003360	LBD
CaS08G003370	LBD
CaS08G003930	bHLH
CaS08G003940	FAR1
CaS08G004180	bZIP
CaS08G004380	bZIP
CaS08G004550	LBD
CaS08G005080	bZIP
CaS08G005150	bHLH
CaS08G005260	bZIP
CaS08G005370	ZF-HD
CaS08G005690	FAR1
CaS08G008580	NF-YB
CaS08G008800	NF-YA
CaS08G009180	E2F/DP
CaS08G009210	E2F/DP
CaS08G009620	NAC
CaS08G010460	WRKY
CaS08G010700	WRKY
CaS08G010700	WRKY
CaS08G010800	WRKY
CaS08G011450	E2F/DP
CaS08G011740	YABBY
CaS08G012170	NAC
CaS08G012500	FAR1
CaS08G012500	FAR1
CaS08G012500	FAR1
CaS08G012610	bHLH
CaS08G013130	WRKY
CaS08G013330	bHLH
CaS08G013490	NF-YB
CaS08G014080	TCP
CaS08G014100	bHLH
CaS08G014320	bHLH
CaS08G015090	WRKY
CaS08G015300	bZIP
CaS08G015330	GRAS
CaS08G015340	WRKY
CaS08G015550	GeBP
CaS08G016290	FAR1
CaS08G016340	EIL
CaS08G016730	Trihelix
CaS08G017430	YABBY
CaS08G017510	bHLH
CaS08G017740	bZIP
CaS08G017850	SRS
CaS08G018360	LBD
CaS08G018430	FAR1
CaS08G018550	bHLH
CaS08G018550	bHLH
CaS08G018680	bHLH
CaS08G018710	Nin-like
CaS08G018710	Nin-like
CaS08G018710	Nin-like
CaS08G018910	bHLH
CaS08G019180	BBR-BPC
CaS08G020590	NAC
CaS08G020740	NAC
CaS08G020930	Trihelix
CaS08G021500	TCP
CaS08G021520	TCP
CaS08G021550	Dof
CaS08G021660	Trihelix
CaS08G021680	Trihelix
CaS08G021760	bZIP
CaS08G022220	bZIP
CaS08G022260	SBP
CaS08G023490	bZIP
CaS08G023550	bHLH
CaS09G000770	NAC
CaS09G000970	FAR1
CaS09G002080	HSF
CaS09G002460	bZIP
CaS09G002780	HSF
CaS09G002980	HSF
CaS09G003100	SRS
CaS09G003150	SBP
CaS09G003160	SBP
CaS09G003270	NAC
CaS09G004050	NF-X1
CaS09G004710	FAR1
CaS09G004710	FAR1
CaS09G004860	bHLH
CaS09G005590	bHLH
CaS09G005790	HSF
CaS09G006200	bHLH
CaS09G006430	WRKY
CaS09G006720	bHLH
CaS09G006820	bZIP
CaS09G006930	NF-YB
CaS09G006930	NF-YB
CaS09G007050	NAC
CaS09G007070	NAC
CaS09G007250	NAC
CaS09G007300	GRAS
CaS09G007810	bHLH
CaS09G007810	bHLH
CaS09G008090	Dof
CaS09G008130	LBD
CaS09G008220	TCP
CaS09G008270	FAR1
CaS09G008300	FAR1
CaS09G008970	bZIP
CaS09G009190	WRKY
CaS09G009300	LBD
CaS09G009860	Trihelix
CaS09G010440	WRKY
CaS09G011490	WRKY
CaS09G011750	LBD
CaS09G011850	LBD
CaS09G014110	Dof
CaS09G015050	LBD
CaS09G015260	NF-YC
CaS09G015290	NF-YC
CaS09G015310	GATA
CaS09G015310	GATA
CaS09G015440	GATA
CaS09G015710	TCP
CaS09G015720	GRAS
CaS09G015740	TCP
CaS09G017620	E2F/DP
CaS09G018240	EIL
CaS09G018240	EIL
CaS09G018630	bHLH
CaS09G019110	NF-YA
CaS09G020150	FAR1
CaS09G020360	Trihelix
CaS09G020360	Trihelix
CaS09G021100	GRAS
CaS09G021160	LBD
CaS09G021280	BES1
CaS09G021280	BES1
CaS09G021280	BES1
CaS09G021410	bZIP
CaS09G021470	GRAS
CaS09G021520	FAR1
CaS09G021610	WRKY
CaS09G021980	SBP
CaS09G022100	SBP
CaS10G000240	NF-YC
CaS10G000370	NAC
CaS10G000370	NAC
CaS10G000580	NAC
CaS10G000610	LBD
CaS10G000830	WRKY
CaS10G002180	Trihelix
CaS10G002580	WRKY
CaS10G002580	WRKY
CaS10G002690	WRKY
CaS10G002690	WRKY
CaS10G003180	WRKY
CaS10G003690	bHLH
CaS10G003890	GRAS
CaS10G003900	GRAS
CaS10G004540	EIL
CaS10G004680	NAC
CaS10G004830	NAC
CaS10G004840	NAC
CaS10G005150	SBP
CaS10G005490	bZIP
CaS10G005530	TCP
CaS10G007940	NAC
CaS10G008590	WRKY
CaS10G008600	GRAS
CaS10G008760	WRKY
CaS10G008870	bHLH
CaS10G009290	FAR1
CaS10G009290	FAR1
CaS10G010180	TCP
CaS10G010690	EIL
CaS10G010920	bHLH
CaS10G010950	bHLH
CaS10G011590	bZIP
CaS10G011800	bHLH
CaS10G013750	bHLH
CaS10G013860	WRKY
CaS10G014300	HSF
CaS10G015830	Trihelix
CaS10G015830	Trihelix
CaS10G015830	Trihelix
CaS10G016650	WRKY
CaS10G016700	NAC
CaS10G016990	NAC
CaS10G017000	NAC
CaS10G017380	WRKY
CaS10G017390	WRKY
CaS10G018140	SBP
CaS10G018810	bHLH
CaS10G018820	bHLH
CaS10G018820	bHLH
CaS10G018880	NF-YB
CaS10G018890	NF-YB
CaS10G020150	GATA
CaS10G020610	TCP
CaS10G022400	FAR1
CaS10G022940	NF-X1
CaS10G023130	LBD
CaS10G023540	LBD
CaS10G024180	bZIP
CaS10G024310	WRKY
CaS10G024390	WRKY
CaS10G025420	NAC
CaS10G025910	bHLH
CaS10G025910	bHLH
CaS10G025920	bHLH
CaS10G025980	TCP
CaS10G026270	bHLH
CaS10G026270	bHLH
CaS10G027080	bHLH
CaS10G027090	WRKY
CaS11G001140	Trihelix
CaS11G002070	YABBY
CaS11G002190	NF-YA
CaS11G002640	Nin-like
CaS11G002640	Nin-like
CaS11G002650	Nin-like
CaS11G002650	Nin-like
CaS11G002680	Nin-like
CaS11G002690	Nin-like
CaS11G002960	SBP
CaS11G003790	GRAS
CaS11G003880	GRAS
CaS11G005000	bHLH
CaS11G005930	NAC
CaS11G006760	HRT-like
CaS11G006760	HRT-like
CaS11G007360	Dof
CaS11G007380	bHLH
CaS11G007380	bHLH
CaS11G007600	bHLH
CaS11G007600	bHLH
CaS11G007860	Nin-like
CaS11G007930	Nin-like
CaS11G007940	Nin-like
CaS11G007970	Nin-like
CaS11G008110	Nin-like
CaS11G008130	Nin-like
CaS11G008170	Nin-like
CaS11G008190	Nin-like
CaS11G008240	Nin-like
CaS11G008240	Nin-like
CaS11G008410	Nin-like
CaS11G008450	Nin-like
CaS11G008450	Nin-like
CaS11G008470	Nin-like
CaS11G008470	Nin-like
CaS11G008540	Nin-like
CaS11G008540	Nin-like
CaS11G008540	Nin-like
CaS11G009100	Nin-like
CaS11G009100	Nin-like
CaS11G009100	Nin-like
CaS11G009850	WRKY
CaS11G009850	WRKY
CaS11G009890	bHLH
CaS11G010150	WRKY
CaS11G010150	WRKY
CaS11G010720	NAC
CaS11G011000	GATA
CaS11G011360	TCP
CaS11G011400	WRKY
CaS11G011510	GRAS
CaS11G011720	HSF
CaS11G011760	GATA
CaS11G011860	bHLH
CaS11G012250	NAC
CaS11G012690	GRAS
CaS11G013510	LBD
CaS11G014790	HSF
CaS11G014820	FAR1
CaS11G015090	Trihelix
CaS11G015340	NF-YA
CaS11G015670	NAC
CaS11G015820	bHLH
CaS11G016560	bZIP
CaS11G016560	bZIP
CaS11G016720	bZIP
CaS11G016770	bZIP
CaS11G017090	BBR-BPC
CaS11G017090	BBR-BPC
CaS11G017690	Nin-like
CaS11G017690	Nin-like
CaS11G017690	Nin-like
CaS11G017720	Nin-like
CaS11G017730	Nin-like
CaS11G017750	Nin-like
CaS11G018650	Nin-like
CaS11G018670	BES1
CaS11G018850	HSF
CaS11G019230	LBD
CaS11G019290	GATA
CaS11G020220	CPP
CaS11G020400	GATA
CaS11G020500	GATA
CaS11G020660	LBD
CaS11G020680	LBD
CaS11G022140	CPP
CaS11G023150	WRKY
CaS11G023580	NAC
CaS11G023580	NAC
CaS11G024280	Trihelix
CaS11G024280	Trihelix
CaS11G024280	Trihelix
CaS11G024350	Trihelix
CaS11G024570	WRKY
CaS11G024910	Trihelix
CaS11G024980	WRKY
CaS11G025450	FAR1
CaS12G000550	CPP
CaS12G001970	Trihelix
CaS12G001990	NAC
CaS12G002000	LBD
CaS12G002270	NAC
CaS12G002280	LBD
CaS12G002710	WRKY
CaS12G003150	FAR1
CaS12G003390	bZIP
CaS12G003620	NF-YA
CaS12G003750	E2F/DP
CaS12G004130	TCP
CaS12G005780	TCP
CaS12G006250	TCP
CaS12G006540	bHLH
CaS12G006570	Trihelix
CaS12G006580	Trihelix
CaS12G006780	WRKY
CaS12G006830	bZIP
CaS12G006880	ZF-HD
CaS12G006910	NAC
CaS12G006930	NAC
CaS12G007060	BES1
CaS12G007220	NF-YA
CaS12G007390	HSF
CaS12G007680	WRKY
CaS12G008020	Dof
CaS12G008120	NAC
CaS12G008640	bZIP
CaS12G008640	bZIP
CaS12G008640	bZIP
CaS12G008640	bZIP
CaS12G008640	bZIP
CaS12G008640	bZIP
CaS12G008760	FAR1
CaS12G008760	FAR1
CaS12G008810	NAC
CaS12G008900	GATA
CaS12G009380	Trihelix
CaS12G010520	bHLH
CaS12G010570	WRKY
CaS12G011150	WRKY
CaS12G011910	WRKY
CaS12G012060	GRAS
CaS12G012270	HRT-like
CaS12G012690	GRAS
CaS12G012760	FAR1
CaS12G013360	NF-YB
CaS12G013890	TCP
CaS12G014110	FAR1
CaS12G015570	WRKY
CaS12G016140	NAC
CaS12G016980	VOZ
CaS12G016980	VOZ
CaS12G017320	WRKY
CaS12G017650	bHLH
CaS12G017760	NF-YB
CaS12G017760	NF-YB
CaS12G017980	bHLH
CaS12G018530	Dof
CaS12G019020	WRKY
CaS12G019090	bZIP
CaS12G019090	bZIP
CaS12G019090	bZIP
CaS12G019090	bZIP
CaS12G019090	bZIP
CaS12G019090	bZIP
CaS12G020270	WRKY
CaS12G020380	VOZ
CaS12G020720	NAC
CaS12G020730	NAC
CaS12G021050	BES1
CaS12G021290	SBP
CaS12G021420	NAC
CaS12G021420	NAC
CaS12G021490	Dof
CaS12G021670	GRAS
CaS12G021790	bHLH
CaS12G021790	bHLH
CaS12G021940	bHLH
CaS12G021940	bHLH
CaS12G022440	Dof
CaS12G022490	Dof
CaS12G023440	bHLH
CaS12G023690	bHLH
CaS12G026970	Nin-like
CaS12G026970	Nin-like
CaS13G000190	NAC
CaS13G000260	NAC
CaS13G000260	NAC
CaS13G000290	NAC
CaS13G000310	bHLH
CaS13G000400	bHLH
CaS13G000830	bHLH
CaS13G000980	WRKY
CaS13G001510	WRKY
CaS13G001520	WRKY
CaS13G002380	BES1
CaS13G002380	BES1
CaS13G002870	EIL
CaS13G002910	FAR1
CaS13G003020	TCP
CaS13G004190	LBD
CaS13G004200	LBD
CaS13G004640	YABBY
CaS13G004770	GRAS
CaS13G004910	GRAS
CaS13G005310	WRKY
CaS13G005350	bHLH
CaS13G005480	SBP
CaS13G005490	SBP
CaS13G005490	SBP
CaS13G005570	SBP
CaS13G005590	SBP
CaS13G005590	SBP
CaS13G006730	WRKY
CaS13G006730	WRKY
CaS13G006820	WRKY
CaS13G006820	WRKY
CaS13G007110	bHLH
CaS13G007570	bZIP
CaS13G008370	bHLH
CaS13G009210	Trihelix
CaS13G009560	GRAS
CaS13G009670	E2F/DP
CaS13G009670	E2F/DP
CaS13G010050	NAC
CaS13G011260	E2F/DP
CaS13G011470	NF-YA
CaS13G011490	NF-YA
CaS13G012270	bHLH
CaS13G013140	bHLH
CaS13G013180	bHLH
CaS13G013650	GATA
CaS13G013710	GRAS
CaS13G013840	bZIP
CaS13G014140	bZIP
CaS13G014140	bZIP
CaS13G014140	bZIP
CaS13G014460	NF-YA
CaS13G014460	NF-YA
CaS13G015020	bHLH
CaS13G015190	Trihelix
CaS13G015430	Trihelix
CaS13G016510	FAR1
CaS13G017060	GeBP
CaS13G017660	NAC
CaS13G018090	Trihelix
CaS13G018400	GATA
CaS13G018620	bHLH
CaS13G019240	NF-YC
CaS13G019280	NF-YC
CaS13G019500	bHLH
CaS13G019500	bHLH
CaS13G019690	FAR1
CaS13G019690	FAR1
CaS13G019760	FAR1
CaS13G019760	FAR1
CaS13G020500	FAR1
CaS13G020680	bZIP
CaS13G020900	YABBY
CaS13G021610	bZIP
CaS13G021890	GATA
CaS13G021930	bHLH
CaS13G022390	bHLH
CaS13G022790	ZF-HD
CaS13G022900	FAR1
CaS13G024120	bZIP
CaS13G024280	NAC
CaS13G024990	GATA
CaS13G025170	WRKY
CaS13G025320	WRKY
CaS13G025320	WRKY
CaS13G025880	NF-YA
CaS13G025880	NF-YA
CaS13G025880	NF-YA
CaS13G026470	SRS
CaS13G027220	bZIP
CaS13G027330	bHLH
CaS13G028320	bHLH
CaS13G028620	bZIP
CaS13G029080	LBD
CaS13G029590	bZIP
CaS13G030490	bZIP
CaS13G030750	GATA
CaS13G030880	SRS
CaS13G032990	FAR1
CaS14G000660	Dof
CaS14G000680	GATA
CaS14G000890	Trihelix
CaS14G000890	Trihelix
CaS14G000890	Trihelix
CaS14G000890	Trihelix
CaS14G000950	Trihelix
CaS14G000950	Trihelix
CaS14G000950	Trihelix
CaS14G000950	Trihelix
CaS14G001650	NAC
CaS14G001750	LBD
CaS14G002300	E2F/DP
CaS14G002550	FAR1
CaS14G003110	bHLH
CaS14G003260	NAC
CaS14G003430	ZF-HD
CaS14G003650	WRKY
CaS14G003920	TCP
CaS14G004220	bHLH
CaS14G004360	bZIP
CaS14G005120	LBD
CaS14G005370	bHLH
CaS14G005520	bHLH
CaS14G005940	GRAS
CaS14G006760	NAC
CaS14G006900	WRKY
CaS14G007470	bHLH
CaS14G007930	bZIP
CaS14G007940	GRAS
CaS14G008240	GRAS
CaS14G008270	bHLH
CaS14G008270	bHLH
CaS14G008310	bHLH
CaS14G008310	bHLH
CaS14G008630	WRKY
CaS14G009010	bHLH
CaS14G009050	GATA
CaS14G009580	Nin-like
CaS14G010230	FAR1
CaS14G010380	NAC
CaS14G010580	NAC
CaS14G011150	GRAS
CaS14G011160	GRAS
CaS14G012280	WRKY
CaS14G012530	TCP
CaS14G012590	NAC
CaS14G012840	TCP
CaS14G012840	TCP
CaS14G013100	bHLH
CaS14G013150	NF-YB
CaS14G013230	Dof
CaS14G013300	TCP
CaS14G013450	TCP
CaS14G014020	bHLH
CaS14G014040	GRAS
CaS14G014370	bHLH
CaS14G015730	Trihelix
CaS14G016060	Trihelix
CaS14G016360	NF-X1
CaS14G016580	NAC
CaS14G016770	bHLH
CaS14G016820	bHLH
CaS14G016820	bHLH
CaS14G016930	bHLH
CaS14G017350	LFY
CaS14G017670	WRKY
CaS14G018540	FAR1
CaS14G018540	FAR1
CaS14G018540	FAR1
CaS14G018540	FAR1
CaS14G018650	FAR1
CaS14G019560	CAMTA
CaS14G019600	Trihelix
CaS14G019860	Trihelix
CaS14G020200	NAC
CaS14G020260	bHLH
CaS14G020480	GATA
CaS14G021050	Dof
CaS14G022410	bHLH
CaS14G022770	NAC
CaS14G022780	LBD
CaS14G022930	bHLH
CaS14G024220	FAR1
CaS14G024480	ZF-HD
CaS14G024640	bHLH
CaS14G024800	bHLH
CaS14G025420	WRKY
CaS14G025720	TCP
CaS14G027010	Nin-like
CaS14G027010	Nin-like
CaS14G027010	Nin-like
CaS14G027480	NAC
CaS14G027510	NAC
CaS14G027510	NAC
CaS14G028430	WRKY
CaS14G028430	WRKY
CaS14G029320	Dof
CaS14G029480	NAC
CaS14G029600	WRKY
CaS14G031600	Nin-like
CaS14G031670	bHLH
CaS14G032900	NAC
CaS14G033160	ZF-HD
CaS14G033180	Nin-like
CaS15G000320	WRKY
CaS15G000420	WRKY
CaS15G000590	GRAS
CaS15G000600	GRAS
CaS15G000750	CAMTA
CaS15G000830	GATA
CaS15G001100	CAMTA
CaS15G001100	CAMTA
CaS15G001190	bZIP
CaS15G002130	SBP
CaS15G002300	FAR1
CaS15G002790	BES1
CaS15G002790	BES1
CaS15G003350	NF-YB
CaS15G003500	CPP
CaS15G003930	bHLH
CaS15G004230	bHLH
CaS15G004750	bHLH
CaS15G004810	FAR1
CaS15G004810	FAR1
CaS15G004920	FAR1
CaS15G004920	FAR1
CaS15G005380	FAR1
CaS15G005380	FAR1
CaS15G005510	bHLH
CaS15G007250	GATA
CaS15G009350	bHLH
CaS15G010790	bHLH
CaS15G010810	bHLH
CaS15G011400	E2F/DP
CaS15G011780	Nin-like
CaS15G012730	SBP
CaS15G012760	SBP
CaS15G013270	GRAS
CaS15G013610	bZIP
CaS15G013790	FAR1
CaS15G014300	GATA
CaS15G014300	GATA
CaS15G014600	bZIP
CaS15G014600	bZIP
CaS15G014810	GATA
CaS15G015700	bHLH
CaS15G015730	BES1
CaS15G015800	bHLH
CaS15G016590	GRAS
CaS15G016590	GRAS
CaS15G017120	bZIP
CaS15G017120	bZIP
CaS15G018670	NF-YB
CaS15G018870	NAC
CaS15G019700	FAR1
CaS15G019910	bHLH
CaS15G020260	bHLH
CaS15G020770	FAR1
CaS15G021100	TCP
CaS15G021270	TCP
CaS15G021390	bZIP
CaS15G021570	SBP
CaS15G021630	NAC
CaS15G021630	NAC
CaS15G021690	Dof
CaS15G021970	SBP
CaS15G022430	NAC
CaS15G022440	NAC
CaS15G022890	SRS
CaS15G023420	bHLH
CaS15G023660	bHLH
CaS15G023760	bHLH
CaS15G024190	Nin-like
CaS15G024210	Nin-like
CaS15G024310	Nin-like
CaS15G024310	Nin-like
CaS15G024340	Nin-like
CaS15G025370	Nin-like
CaS15G025470	Nin-like
CaS15G025490	Nin-like
CaS15G025530	Nin-like
CaS15G025630	GRAS
CaS15G025650	WRKY
CaS15G026010	NF-YB
CaS15G026200	Trihelix
CaS15G026310	NF-YB
CaS15G026830	WRKY
CaS15G026910	FAR1
CaS15G026920	FAR1
CaS15G026980	GRAS
CaS15G027020	GRAS
CaS15G027130	NAC
CaS15G027450	FAR1
CaS15G027470	FAR1
CaS02G010690	ARF
CaS03G009950	ARF
CaS04G015320	ARF
CaS05G033500	ARF
CaS06G004140	ARF
CaS06G004140	ARF
CaS06G005550	ARF
CaS06G006470	ARF
CaS06G006470	ARF
CaS07G007880	ARF
CaS08G000490	ARF
CaS08G002080	ARF
CaS08G002080	ARF
CaS08G009420	ARF
CaS08G014390	ARF
CaS09G004730	ARF
CaS09G015200	ARF
CaS09G015430	ARF
CaS10G020140	ARF
CaS11G000200	ARF
CaS11G008600	ARF
CaS11G008730	ARF
CaS11G008730	ARF
CaS12G004320	ARF
CaS12G015280	ARF
CaS12G015280	ARF
CaS12G016930	ARF
CaS12G016930	ARF
CaS12G020630	ARF
CaS12G020630	ARF
CaS12G020810	ARF
CaS12G020810	ARF
CaS01G014090	B3
CaS01G014090	B3
CaS01G014430	B3
CaS01G015510	B3
CaS01G017160	B3
CaS01G020820	B3
CaS01G025460	B3
CaS01G033210	B3
CaS01G033210	B3
CaS01G033220	B3
CaS01G033230	B3
CaS01G033230	B3
CaS01G033360	B3
CaS01G033370	B3
CaS01G033380	B3
CaS01G033380	B3
CaS02G005350	B3
CaS02G024290	B3
CaS04G004940	B3
CaS04G004940	B3
CaS04G019320	B3
CaS05G000240	B3
CaS05G006080	B3
CaS05G006080	B3
CaS05G006090	B3
CaS05G006220	B3
CaS05G019970	B3
CaS05G035250	B3
CaS05G035250	B3
CaS05G035250	B3
CaS05G035250	B3
CaS05G036590	B3
CaS05G036670	B3
CaS05G036680	B3
CaS05G036680	B3
CaS06G001040	B3
CaS06G009370	B3
CaS06G009860	B3
CaS06G019780	B3
CaS06G022490	B3
CaS06G024520	B3
CaS06G024520	B3
CaS07G017130	B3
CaS08G017550	B3
CaS09G011070	B3
CaS09G011070	B3
CaS09G011360	B3
CaS09G011360	B3
CaS09G015200	B3
CaS10G017460	B3
CaS10G019210	B3
CaS10G019230	B3
CaS10G019640	B3
CaS10G019660	B3
CaS10G020680	B3
CaS10G020690	B3
CaS10G020700	B3
CaS11G013630	B3
CaS11G013640	B3
CaS11G013650	B3
CaS11G013660	B3
CaS11G013670	B3
CaS11G013680	B3
CaS11G021210	B3
CaS11G025490	B3
CaS12G008460	B3
CaS12G008460	B3
CaS12G022950	B3
CaS13G028640	B3
CaS13G028640	B3
CaS13G029420	B3
CaS13G029430	B3
CaS13G029450	B3
CaS14G015790	B3
CaS14G021790	B3
CaS15G008960	B3
CaS15G022640	B3
CaS01G009590	AP2
CaS01G009590	AP2
CaS01G009590	AP2
CaS01G032670	AP2
CaS02G021970	AP2
CaS03G011030	AP2
CaS04G004150	AP2
CaS04G007030	AP2
CaS05G008100	AP2
CaS05G008100	AP2
CaS05G033110	AP2
CaS06G026800	AP2
CaS06G026880	AP2
CaS06G027100	AP2
CaS08G021950	AP2
CaS09G014630	AP2
CaS10G018490	AP2
CaS13G016000	AP2
CaS13G016330	AP2
CaS14G006650	AP2
CaS14G006790	AP2
CaS14G011450	AP2
CaS14G031110	AP2
CaS15G011320	AP2
CaS15G018690	AP2
CaS01G030540	AP2
CaS13G016330	AP2
CaS13G016000	AP2
CaS06G033990	AP2
CaS06G029870	AP2
CaS03G009010	AP2
CaS05G032590	AP2
CaS01G001740	ERF
CaS01G001740	ERF
CaS01G002400	ERF
CaS01G012650	ERF
CaS01G012990	ERF
CaS01G013180	ERF
CaS01G014200	ERF
CaS01G015470	ERF
CaS01G015610	ERF
CaS01G020120	ERF
CaS01G021530	ERF
CaS01G023240	ERF
CaS01G025740	ERF
CaS01G027510	ERF
CaS01G027660	ERF
CaS01G032070	ERF
CaS01G034730	ERF
CaS02G005690	ERF
CaS02G015180	ERF
CaS02G025800	ERF
CaS03G001610	ERF
CaS03G003810	ERF
CaS03G003820	ERF
CaS03G003950	ERF
CaS03G005590	ERF
CaS03G012600	ERF
CaS03G015700	ERF
CaS03G017480	ERF
CaS04G000640	ERF
CaS04G004150	ERF
CaS04G008330	ERF
CaS04G010120	ERF
CaS04G010750	ERF
CaS04G011780	ERF
CaS04G014830	ERF
CaS04G019390	ERF
CaS04G019410	ERF
CaS04G019420	ERF
CaS04G022040	ERF
CaS04G022830	ERF
CaS04G022840	ERF
CaS04G027650	ERF
CaS05G005220	ERF
CaS05G005230	ERF
CaS05G006280	ERF
CaS05G007840	ERF
CaS05G008100	ERF
CaS05G014940	ERF
CaS05G015610	ERF
CaS05G017680	ERF
CaS05G018250	ERF
CaS05G021940	ERF
CaS05G023420	ERF
CaS05G023430	ERF
CaS05G026890	ERF
CaS05G027650	ERF
CaS05G027660	ERF
CaS05G027670	ERF
CaS05G027980	ERF
CaS05G036570	ERF
CaS05G036610	ERF
CaS06G012220	ERF
CaS06G022160	ERF
CaS06G022420	ERF
CaS06G022430	ERF
CaS06G023840	ERF
CaS06G028100	ERF
CaS06G028110	ERF
CaS06G028990	ERF
CaS06G033760	ERF
CaS07G002760	ERF
CaS07G003920	ERF
CaS07G003990	ERF
CaS07G004000	ERF
CaS07G004310	ERF
CaS07G004320	ERF
CaS07G008500	ERF
CaS07G010090	ERF
CaS08G012450	ERF
CaS08G013120	ERF
CaS08G022770	ERF
CaS09G009660	ERF
CaS09G011230	ERF
CaS09G011820	ERF
CaS09G013190	ERF
CaS09G016710	ERF
CaS09G017960	ERF
CaS09G020820	ERF
CaS09G020840	ERF
CaS10G004040	ERF
CaS10G005360	ERF
CaS10G011510	ERF
CaS10G015170	ERF
CaS10G018200	ERF
CaS10G023180	ERF
CaS10G024680	ERF
CaS11G005180	ERF
CaS11G009260	ERF
CaS11G009470	ERF
CaS11G011420	ERF
CaS11G011430	ERF
CaS11G013000	ERF
CaS11G013750	ERF
CaS11G013860	ERF
CaS11G013880	ERF
CaS11G014030	ERF
CaS11G020350	ERF
CaS12G000680	ERF
CaS12G005420	ERF
CaS12G021190	ERF
CaS12G021390	ERF
CaS12G024390	ERF
CaS13G000820	ERF
CaS13G001070	ERF
CaS13G005140	ERF
CaS13G006070	ERF
CaS13G011430	ERF
CaS13G018120	ERF
CaS13G026840	ERF
CaS13G027900	ERF
CaS14G002520	ERF
CaS14G003580	ERF
CaS14G006630	ERF
CaS14G006810	ERF
CaS14G007010	ERF
CaS14G008100	ERF
CaS14G012700	ERF
CaS14G017130	ERF
CaS14G017240	ERF
CaS14G017250	ERF
CaS14G020060	ERF
CaS14G029560	ERF
CaS14G032510	ERF
CaS15G000940	ERF
CaS15G005470	ERF
CaS15G007110	ERF
CaS15G008160	ERF
CaS15G013180	ERF
CaS15G022830	ERF
CaS01G012700	DBB
CaS01G018090	DBB
CaS04G002600	DBB
CaS04G002610	DBB
CaS04G002620	DBB
CaS04G019760	DBB
CaS08G006540	DBB
CaS11G020990	DBB
CaS15G009030	DBB
CaS01G012320	CO-like
CaS01G030030	CO-like
CaS03G001620	CO-like
CaS05G004360	CO-like
CaS05G017220	CO-like
CaS06G034250	CO-like
CaS08G009410	CO-like
CaS09G020240	CO-like
CaS13G027940	CO-like
CaS14G004320	CO-like
CaS01G009400	ARR-B
CaS01G009400	ARR-B
CaS01G009400	ARR-B
CaS02G024610	ARR-B
CaS03G011400	ARR-B
CaS03G011400	ARR-B
CaS04G027790	ARR-B
CaS06G025890	ARR-B
CaS06G035110	ARR-B
CaS06G035110	ARR-B
CaS07G015970	ARR-B
CaS09G018360	ARR-B
CaS10G013000	ARR-B
CaS12G016750	ARR-B
CaS12G016750	ARR-B
CaS12G016770	ARR-B
CaS13G016970	ARR-B
CaS15G000780	ARR-B
CaS15G001070	ARR-B
CaS01G012910	G2-like
CaS01G023620	G2-like
CaS01G032880	G2-like
CaS01G033390	G2-like
CaS01G035560	G2-like
CaS02G003580	G2-like
CaS02G003900	G2-like
CaS02G004680	G2-like
CaS02G004860	G2-like
CaS02G005780	G2-like
CaS02G006270	G2-like
CaS02G010020	G2-like
CaS02G014640	G2-like
CaS02G022470	G2-like
CaS02G022480	G2-like
CaS02G022840	G2-like
CaS02G022840	G2-like
CaS03G006700	G2-like
CaS03G013350	G2-like
CaS04G021990	G2-like
CaS05G002680	G2-like
CaS05G012590	G2-like
CaS05G012590	G2-like
CaS05G017600	G2-like
CaS05G019630	G2-like
CaS05G029160	G2-like
CaS05G036170	G2-like
CaS05G036520	G2-like
CaS05G036520	G2-like
CaS06G016460	G2-like
CaS06G025240	G2-like
CaS06G029190	G2-like
CaS06G030920	G2-like
CaS07G003950	G2-like
CaS07G006440	G2-like
CaS07G012400	G2-like
CaS07G018480	G2-like
CaS08G011900	G2-like
CaS08G011900	G2-like
CaS09G007480	G2-like
CaS09G007880	G2-like
CaS09G013350	G2-like
CaS09G018360	G2-like
CaS09G021070	G2-like
CaS10G000090	G2-like
CaS10G002630	G2-like
CaS10G007470	G2-like
CaS10G015050	G2-like
CaS11G002920	G2-like
CaS11G004000	G2-like
CaS11G016300	G2-like
CaS11G016400	G2-like
CaS11G017450	G2-like
CaS12G005510	G2-like
CaS12G006630	G2-like
CaS12G027400	G2-like
CaS13G005940	G2-like
CaS13G016090	G2-like
CaS14G006720	G2-like
CaS14G010880	G2-like
CaS14G014920	G2-like
CaS14G014940	G2-like
CaS14G019240	G2-like
CaS14G027220	G2-like
CaS14G027220	G2-like
CaS14G030220	G2-like
CaS15G007710	G2-like
CaS15G007710	G2-like
CaS15G007720	G2-like
CaS15G007790	G2-like
CaS15G008720	G2-like
CaS15G017050	G2-like
CaS01G012140	MIKC_MADS
CaS01G012140	MIKC_MADS
CaS02G025480	MIKC_MADS
CaS03G002690	MIKC_MADS
CaS04G013810	MIKC_MADS
CaS04G013900	MIKC_MADS
CaS05G008810	MIKC_MADS
CaS05G010120	MIKC_MADS
CaS05G035640	MIKC_MADS
CaS06G011830	MIKC_MADS
CaS07G002960	MIKC_MADS
CaS08G023160	MIKC_MADS
CaS08G023160	MIKC_MADS
CaS08G023340	MIKC_MADS
CaS08G023340	MIKC_MADS
CaS12G003290	MIKC_MADS
CaS13G021830	MIKC_MADS
CaS13G024900	MIKC_MADS
CaS14G031860	MIKC_MADS
CaS15G004700	MIKC_MADS
CaS15G017850	MIKC_MADS
CaS15G022900	MIKC_MADS
CaS15G022900	MIKC_MADS
CaS02G017890	M-type_MADS
CaS03G004360	M-type_MADS
CaS03G004360	M-type_MADS
CaS03G014820	M-type_MADS
CaS04G001540	M-type_MADS
CaS04G008520	M-type_MADS
CaS04G008520	M-type_MADS
CaS04G017490	M-type_MADS
CaS04G026650	M-type_MADS
CaS05G002930	M-type_MADS
CaS05G005610	M-type_MADS
CaS05G008260	M-type_MADS
CaS05G023890	M-type_MADS
CaS06G010720	M-type_MADS
CaS06G014260	M-type_MADS
CaS06G034480	M-type_MADS
CaS07G000990	M-type_MADS
CaS07G000990	M-type_MADS
CaS08G004650	M-type_MADS
CaS12G015340	M-type_MADS
CaS12G015360	M-type_MADS
CaS12G018880	M-type_MADS
CaS12G018890	M-type_MADS
CaS13G013420	M-type_MADS
CaS13G020990	M-type_MADS
CaS13G028300	M-type_MADS
CaS14G013960	M-type_MADS
CaS14G024010	M-type_MADS
CaS14G024010	M-type_MADS
CaS14G024890	M-type_MADS
CaS01G007390	GRF
CaS01G011950	GRF
CaS01G011950	GRF
CaS01G031040	GRF
CaS02G012930	GRF
CaS03G017000	GRF
CaS03G017070	GRF
CaS04G006760	GRF
CaS04G006850	GRF
CaS05G012920	GRF
CaS06G024880	GRF
CaS07G006590	GRF
CaS10G021700	GRF
CaS10G028900	GRF
CaS11G000190	GRF
CaS11G000190	GRF
CaS11G011950	GRF
CaS11G017840	GRF
CaS14G005800	GRF
CaS14G022720	GRF
CaS02G001420	HB-other
CaS05G027140	HB-other
CaS05G033550	HB-other
CaS07G001780	HB-other
CaS07G010740	HB-other
CaS08G017160	HB-other
CaS08G018130	HB-other
CaS08G018130	HB-other
CaS09G003350	HB-other
CaS09G004630	HB-other
CaS10G005450	HB-other
CaS11G010070	HB-other
CaS11G010070	HB-other
CaS11G022190	HB-other
CaS13G024570	HB-other
CaS14G006740	HB-other
CaS15G003320	HB-other
CaS01G032080	WOX
CaS09G014490	WOX
CaS09G014470	WOX
CaS14G023450	WOX
CaS03G000530	WOX
CaS12G020320	WOX
CaS05G030690	WOX
CaS14G012180	WOX
CaS14G009650	WOX
CaS05G011740	WOX
CaS14G009140	WOX
CaS03G016300	WOX
CaS05G025700	WOX
CaS05G001480	WOX
CaS05G025700	WOX
CaS05G001480	WOX
CaS07G012340	TALE
CaS01G012790	TALE
CaS08G008940	TALE
CaS08G011630	TALE
CaS04G002800	TALE
CaS04G002300	TALE
CaS08G010120	TALE
CaS01G002880	TALE
CaS01G034220	TALE
CaS13G006170	TALE
CaS09G001870	TALE
CaS14G009270	TALE
CaS05G005910	TALE
CaS14G007810	TALE
CaS11G019380	TALE
CaS01G033600	TALE
CaS07G007690	TALE
CaS01G034370	TALE
CaS05G002010	HD-ZIP
CaS14G001860	HD-ZIP
CaS14G002040	HD-ZIP
CaS07G011530	HD-ZIP
CaS06G031320	HD-ZIP
CaS05G015920	HD-ZIP
CaS05G015920	HD-ZIP
CaS05G015820	HD-ZIP
CaS06G031320	HD-ZIP
CaS08G017480	HD-ZIP
CaS05G003070	HD-ZIP
CaS04G004270	HD-ZIP
CaS14G014260	HD-ZIP
CaS11G013320	HD-ZIP
CaS06G009030	HD-ZIP
CaS04G007430	HD-ZIP
CaS02G000480	HD-ZIP
CaS05G020560	HD-ZIP
CaS06G015780	HD-ZIP
CaS13G016130	HD-ZIP
CaS13G031790	HD-ZIP
CaS06G015780	HD-ZIP
CaS05G008750	HD-ZIP
CaS08G010620	HD-ZIP
CaS01G030370	HD-ZIP
CaS04G007230	HD-ZIP
CaS11G024850	HD-ZIP
CaS06G018610	HD-ZIP
CaS14G007910	HD-ZIP
CaS05G005830	HD-ZIP
CaS13G030530	HD-ZIP
CaS14G021940	HD-ZIP
CaS14G031480	HD-ZIP
CaS07G014550	HD-ZIP
CaS07G014690	HD-ZIP
CaS12G006940	HD-ZIP
CaS10G021760	HD-ZIP
CaS13G012650	HD-ZIP
CaS06G006930	HD-ZIP
CaS01G030360	TALE
CaS12G011300	TALE
CaS04G007250	TALE
CaS01G007630	TALE
CaS12G026550	TALE
CaS06G003800	TALE
CaS13G020700	TALE
CaS13G021590	TALE
CaS02G023810	TALE
CaS03G007350	TALE
CaS13G011090	TALE
CaS13G025910	TALE
CaS14G012920	TALE
CaS07G010160	TALE
CaS07G002840	TALE
CaS06G032840	TALE
CaS06G032970	TALE
CaS11G011320	TALE
CaS11G023360	HD-ZIP
CaS12G009480	HD-ZIP
CaS05G006770	HD-ZIP
CaS12G025540	HD-ZIP
CaS15G014040	HD-ZIP
CaS05G022880	HD-ZIP
CaS05G022880	HD-ZIP
CaS12G008910	HD-ZIP
CaS05G023320	HD-ZIP
CaS12G008910	HD-ZIP
CaS05G023320	HD-ZIP
CaS07G008340	HD-ZIP
CaS07G008340	HD-ZIP
CaS03G015790	HD-ZIP
CaS03G015790	HD-ZIP
CaS14G020510	HD-ZIP
CaS12G003630	HD-ZIP
CaS03G000060	HD-ZIP
CaS11G020430	HD-ZIP
CaS11G020520	HD-ZIP
CaS02G001420	HD-ZIP
CaS11G016270	HD-ZIP
CaS09G015400	HD-ZIP
CaS03G015790	HD-ZIP
CaS03G015790	HD-ZIP
CaS14G020510	HD-ZIP
CaS14G020550	HD-ZIP
CaS07G010730	HB-PHD
CaS07G010730	HB-PHD
CaS08G018120	HB-PHD
CaS08G018120	HB-PHD
CaS08G018120	HB-PHD
CaS05G036720	HB-PHD
CaS15G006600	HB-PHD
CaS02G000600	HB-PHD
CaS02G000600	HB-PHD
CaS01G004930	C2H2
CaS01G005730	C2H2
CaS01G006670	C3H
CaS01G008470	C3H
CaS01G008470	C3H
CaS01G012120	C2H2
CaS01G018260	C3H
CaS01G018270	C3H
CaS01G018360	C2H2
CaS01G021590	C2H2
CaS01G028140	C2H2
CaS01G028140	C2H2
CaS01G028240	C2H2
CaS01G028240	C2H2
CaS01G030590	C2H2
CaS01G033820	C2H2
CaS01G034570	C2H2
CaS02G000350	C2H2
CaS02G000950	C2H2
CaS02G001030	C2H2
CaS02G001130	C3H
CaS02G011250	C2H2
CaS02G013120	C2H2
CaS02G019190	C2H2
CaS02G021810	C2H2
CaS03G000080	C2H2
CaS03G002990	C2H2
CaS03G003070	C2H2
CaS03G005110	C3H
CaS03G012660	C2H2
CaS03G014320	C3H
CaS03G017210	C3H
CaS03G018350	C2H2
CaS04G007960	C3H
CaS04G011750	C3H
CaS04G011750	C3H
CaS04G012640	C3H
CaS04G015220	C2H2
CaS04G016700	C2H2
CaS04G019730	C3H
CaS04G019730	C3H
CaS04G026940	C3H
CaS05G003890	C2H2
CaS05G005490	C3H
CaS05G005770	C2H2
CaS05G011410	C2H2
CaS05G015690	C2H2
CaS05G016780	C3H
CaS05G023960	C2H2
CaS05G024320	C3H
CaS05G025430	C2H2
CaS05G032500	C2H2
CaS05G033060	C3H
CaS05G034320	C2H2
CaS05G036910	C2H2
CaS06G004340	C3H
CaS06G004830	C3H
CaS06G004850	C3H
CaS06G004850	C3H
CaS06G008220	C3H
CaS06G010850	C3H
CaS06G011090	C2H2
CaS06G017980	C3H
CaS06G018180	C3H
CaS06G018180	C3H
CaS06G018180	C3H
CaS06G018200	C3H
CaS06G022530	C3H
CaS06G022550	C3H
CaS06G026090	C2H2
CaS06G029200	C2H2
CaS07G000560	C2H2
CaS07G005820	C2H2
CaS07G007840	C2H2
CaS07G008250	C3H
CaS07G009970	C2H2
CaS07G013440	C2H2
CaS07G014350	C3H
CaS07G017310	C2H2
CaS07G018700	C2H2
CaS07G018730	C2H2
CaS07G019100	C3H
CaS07G019610	C3H
CaS07G019610	C3H
CaS08G001640	C3H
CaS08G009600	C2H2
CaS08G010480	C2H2
CaS08G011000	C3H
CaS08G011000	C3H
CaS08G011010	C2H2
CaS08G011260	C2H2
CaS08G014690	C3H
CaS08G014920	C3H
CaS08G015600	C2H2
CaS08G018340	C2H2
CaS08G018610	C2H2
CaS09G006000	C2H2
CaS09G007340	C2H2
CaS09G014210	C2H2
CaS09G015220	C2H2
CaS09G016390	C2H2
CaS09G017040	C2H2
CaS09G017550	C2H2
CaS09G020020	C3H
CaS09G021260	C2H2
CaS09G021260	C2H2
CaS10G002680	C3H
CaS10G003750	C2H2
CaS10G011360	C3H
CaS10G014710	C3H
CaS10G017790	C2H2
CaS10G017840	C3H
CaS10G026440	C2H2
CaS11G004070	C3H
CaS11G004070	C3H
CaS11G006280	C3H
CaS11G008760	C2H2
CaS11G012720	C2H2
CaS11G014340	C3H
CaS11G014350	C2H2
CaS11G014350	C2H2
CaS11G014350	C2H2
CaS11G015700	LSD
CaS11G015740	C2H2
CaS11G015900	C2H2
CaS11G019210	C2H2
CaS11G019520	C3H
CaS12G002150	LSD
CaS12G007280	C3H
CaS12G009630	C3H
CaS12G011270	C2H2
CaS12G017410	C3H
CaS12G021230	C3H
CaS12G021360	C3H
CaS12G022160	LSD
[truncated: 289 more rows]
