# Supplementary figures and images for: Multi-omics analysis of the co-expression features of specific neighboring gene pairs suggests an association with catechin regulation in Camellia sinensis
Source: Research Square preprint supplement (doi:10.21203/rs.3.rs-7249588/v1), 2025-08-19

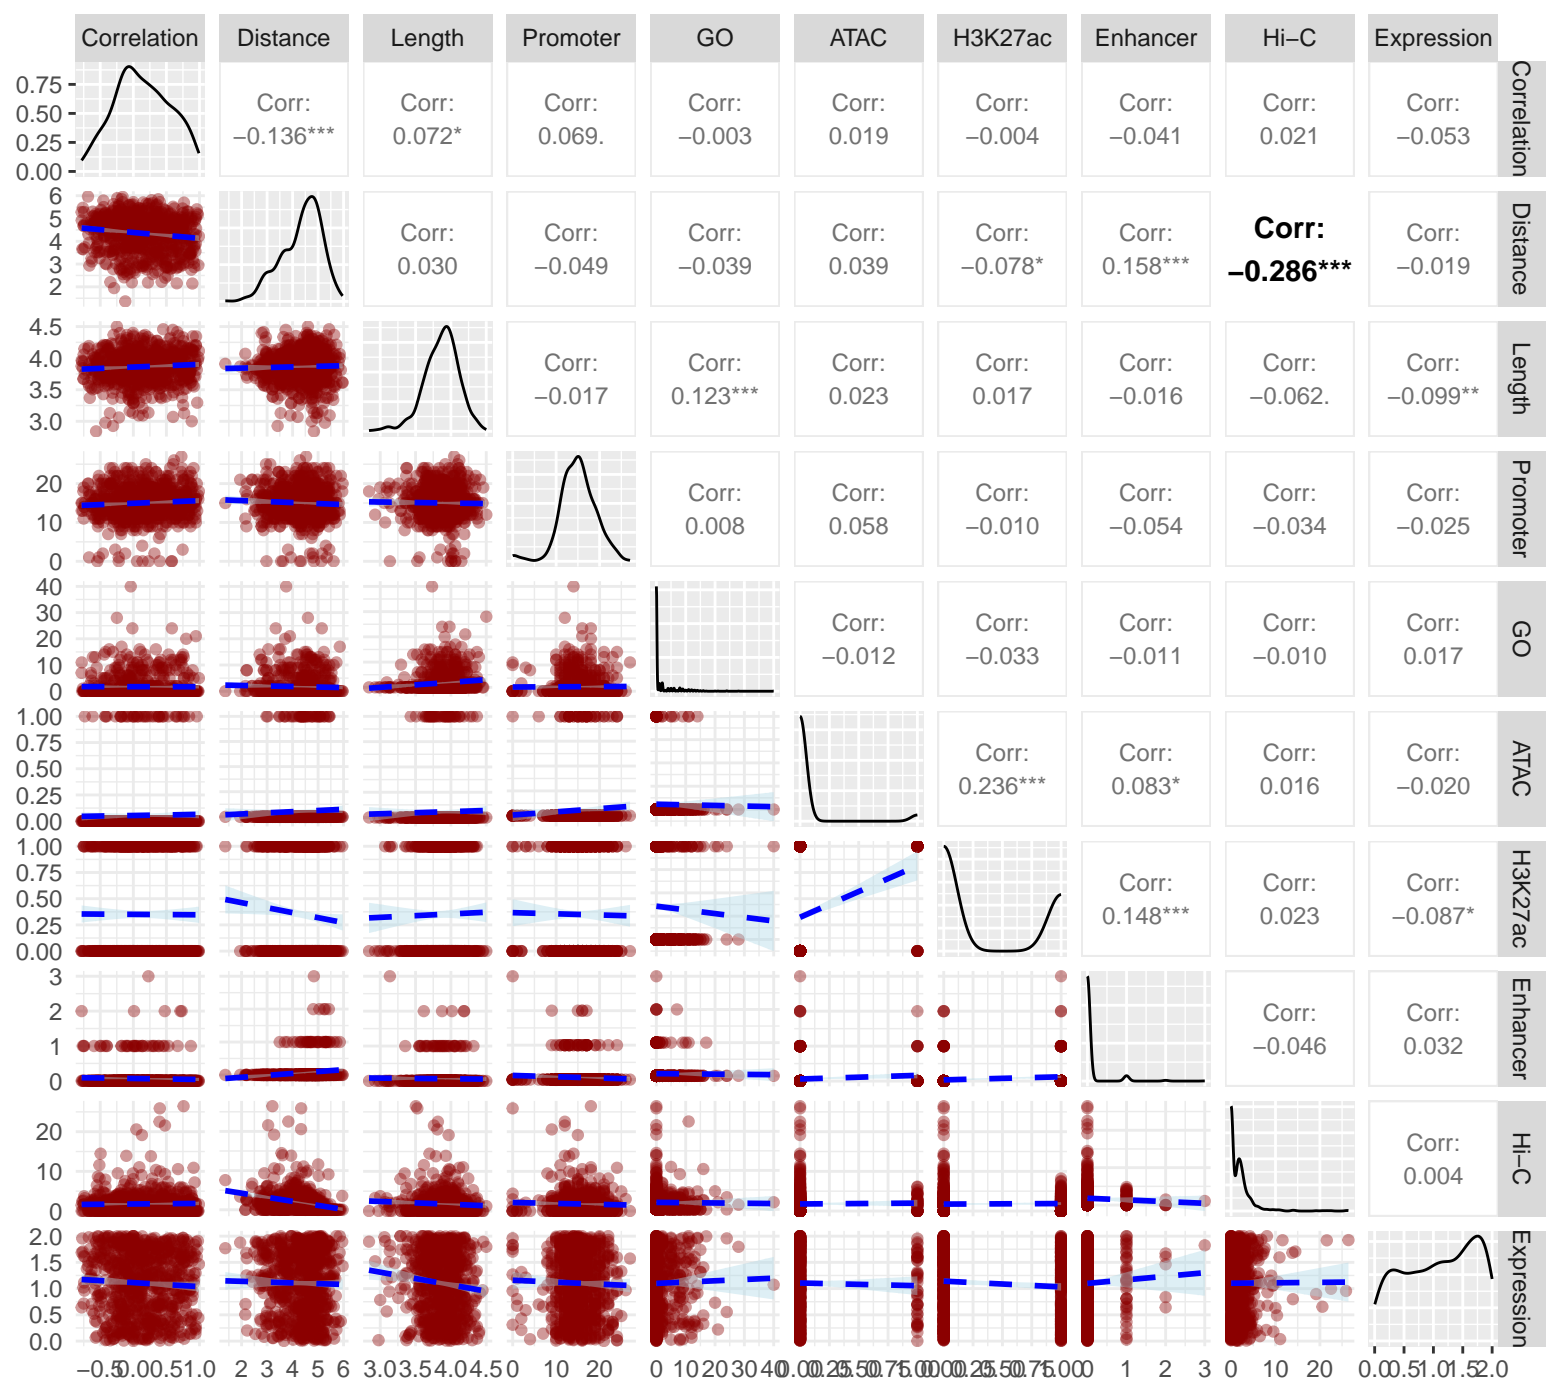

Supplement: Supplementary file 1 [file 46b1e80d2305b3d69595f41d.pdf]

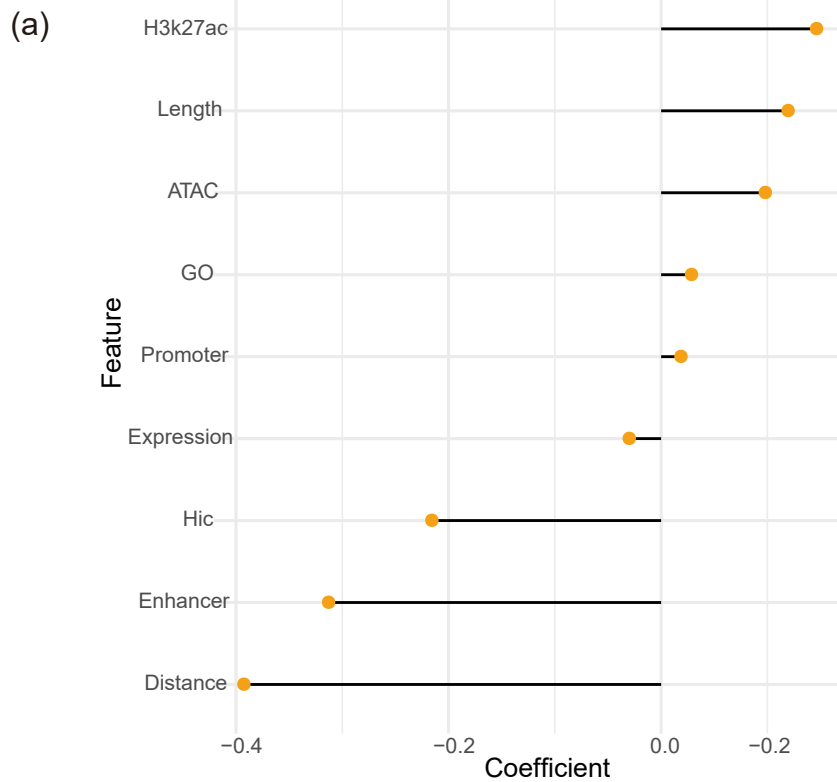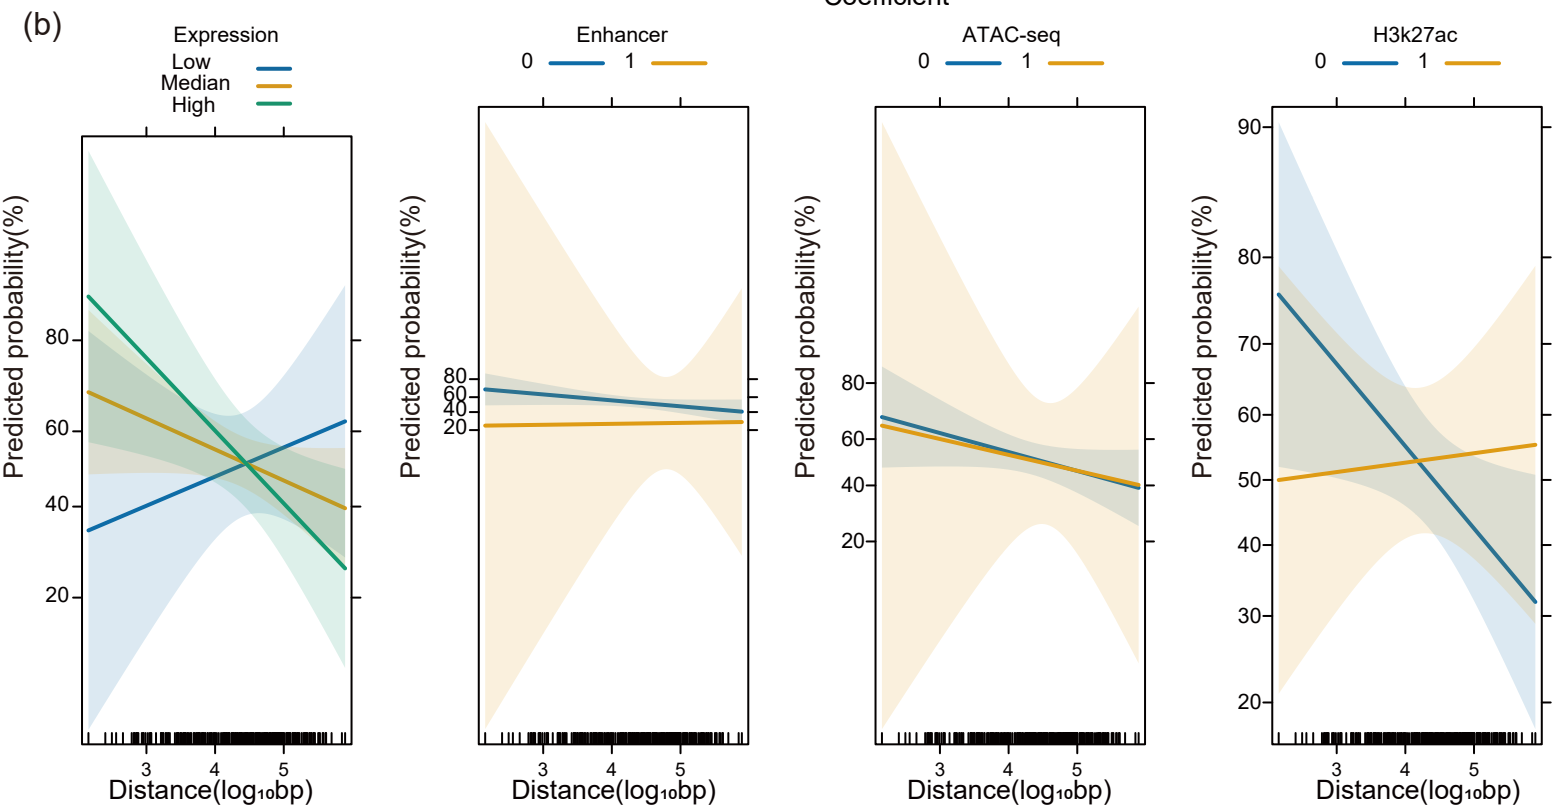

Supplement: Supplementary file 2 [file 4d74779bc6a6218e0639d5e4.pdf]

(a)

Cluster Dendrogram

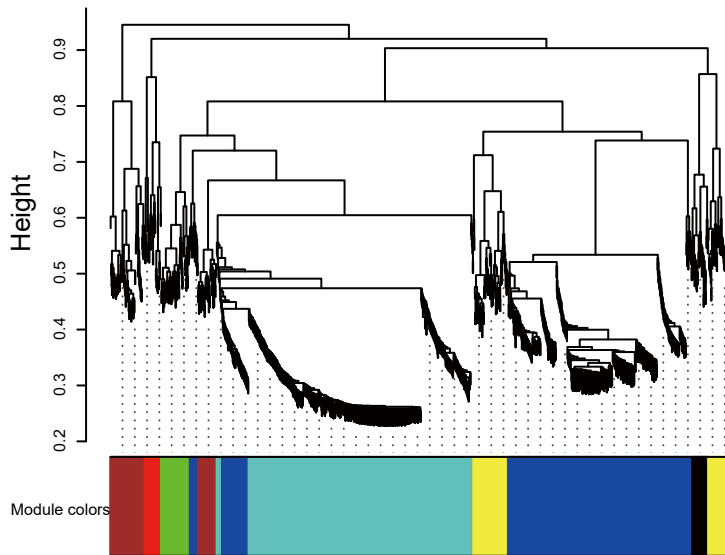

(b)

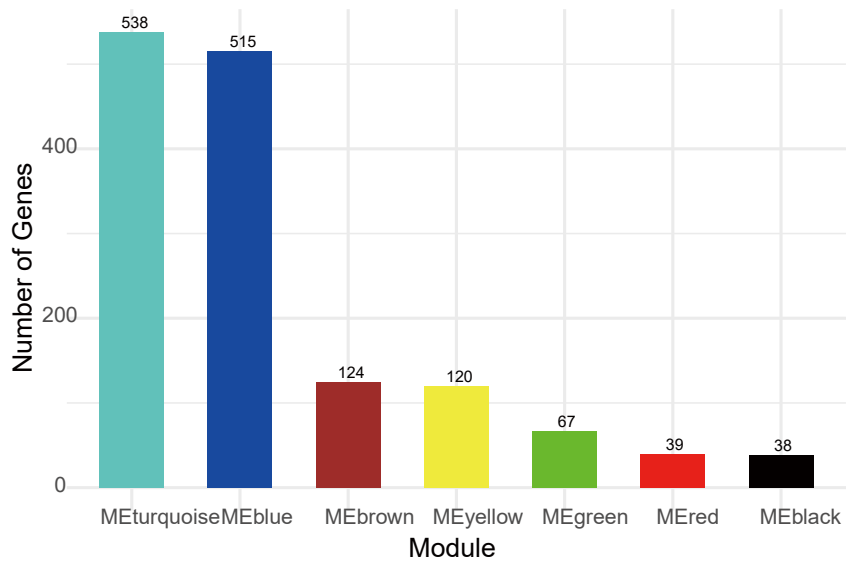

Supplement: Supplementary file 3 [file 8ad8290b040010be7090e9fc.pdf]

(a)

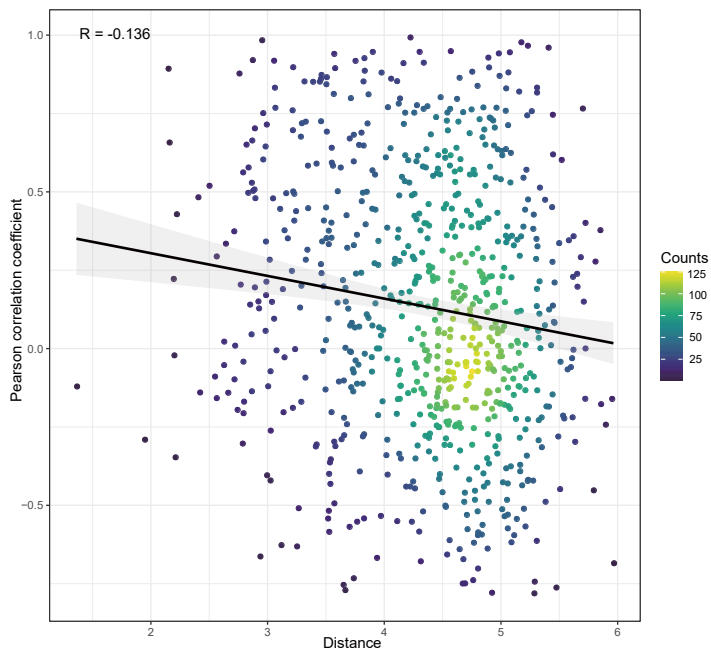

(b)

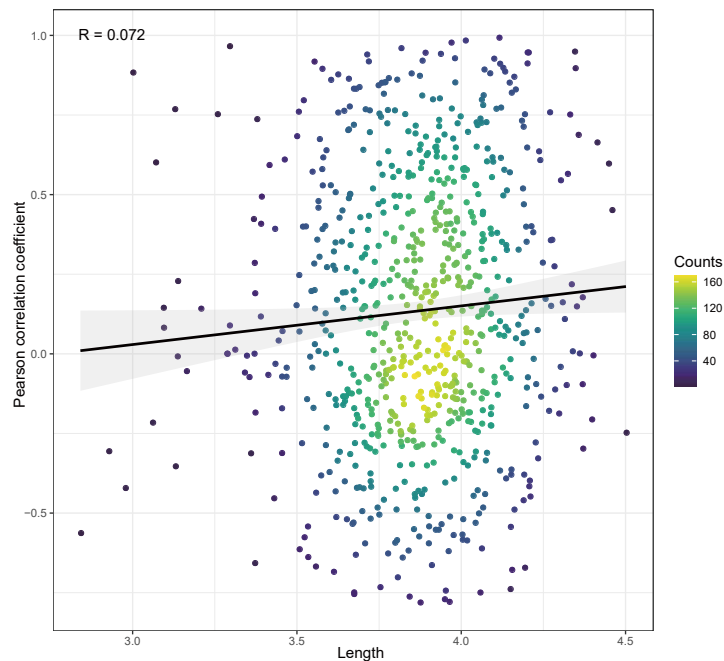

(c)

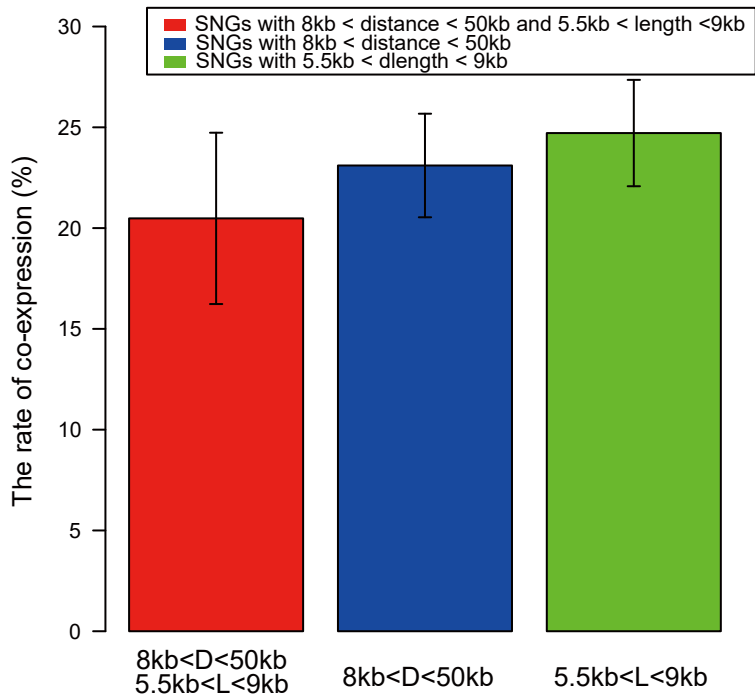

(d)

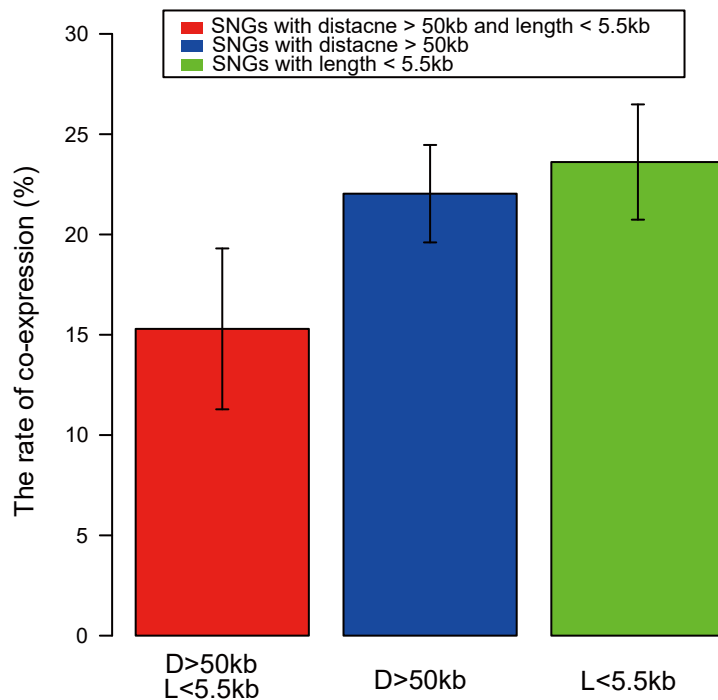

Supplement: Supplementary file 5 [file 98453694c21bd6d4e6c7885c.pdf]

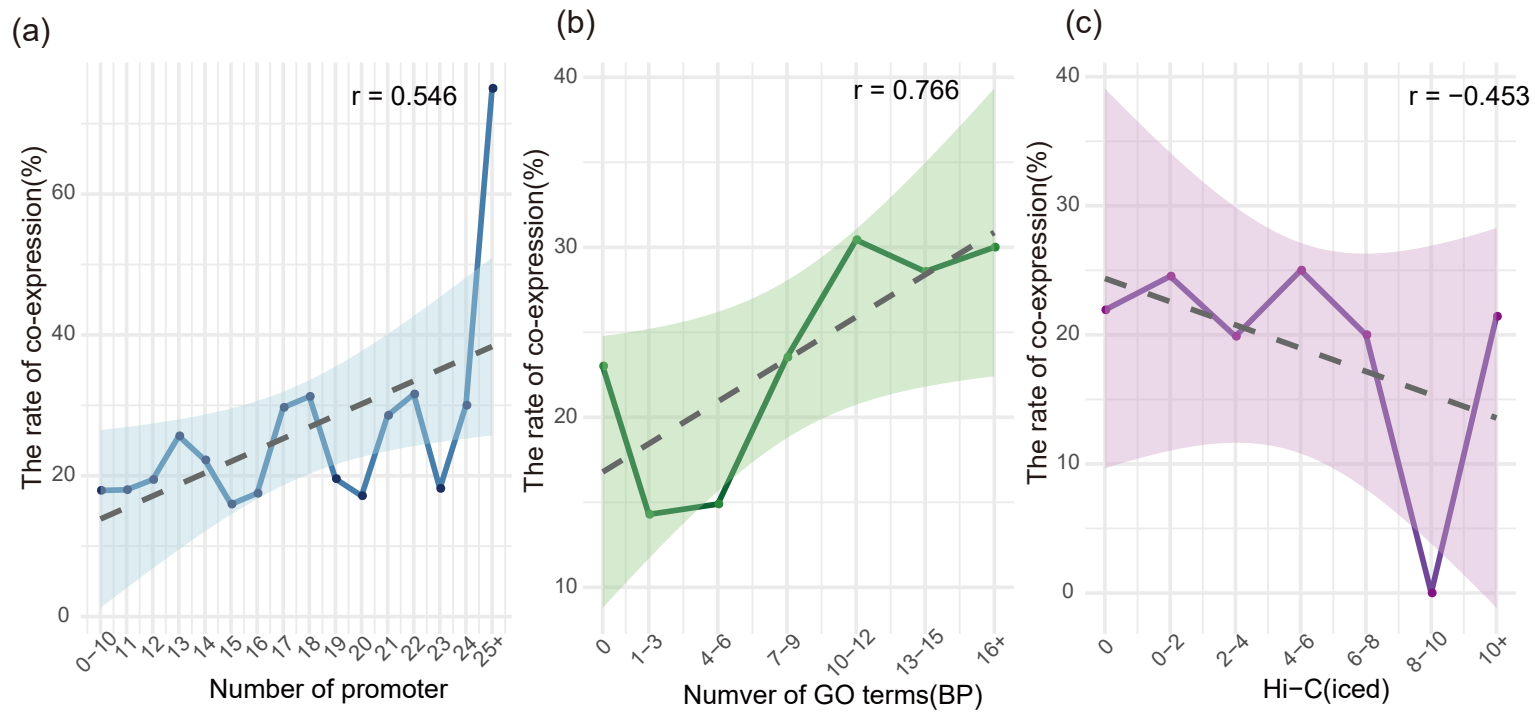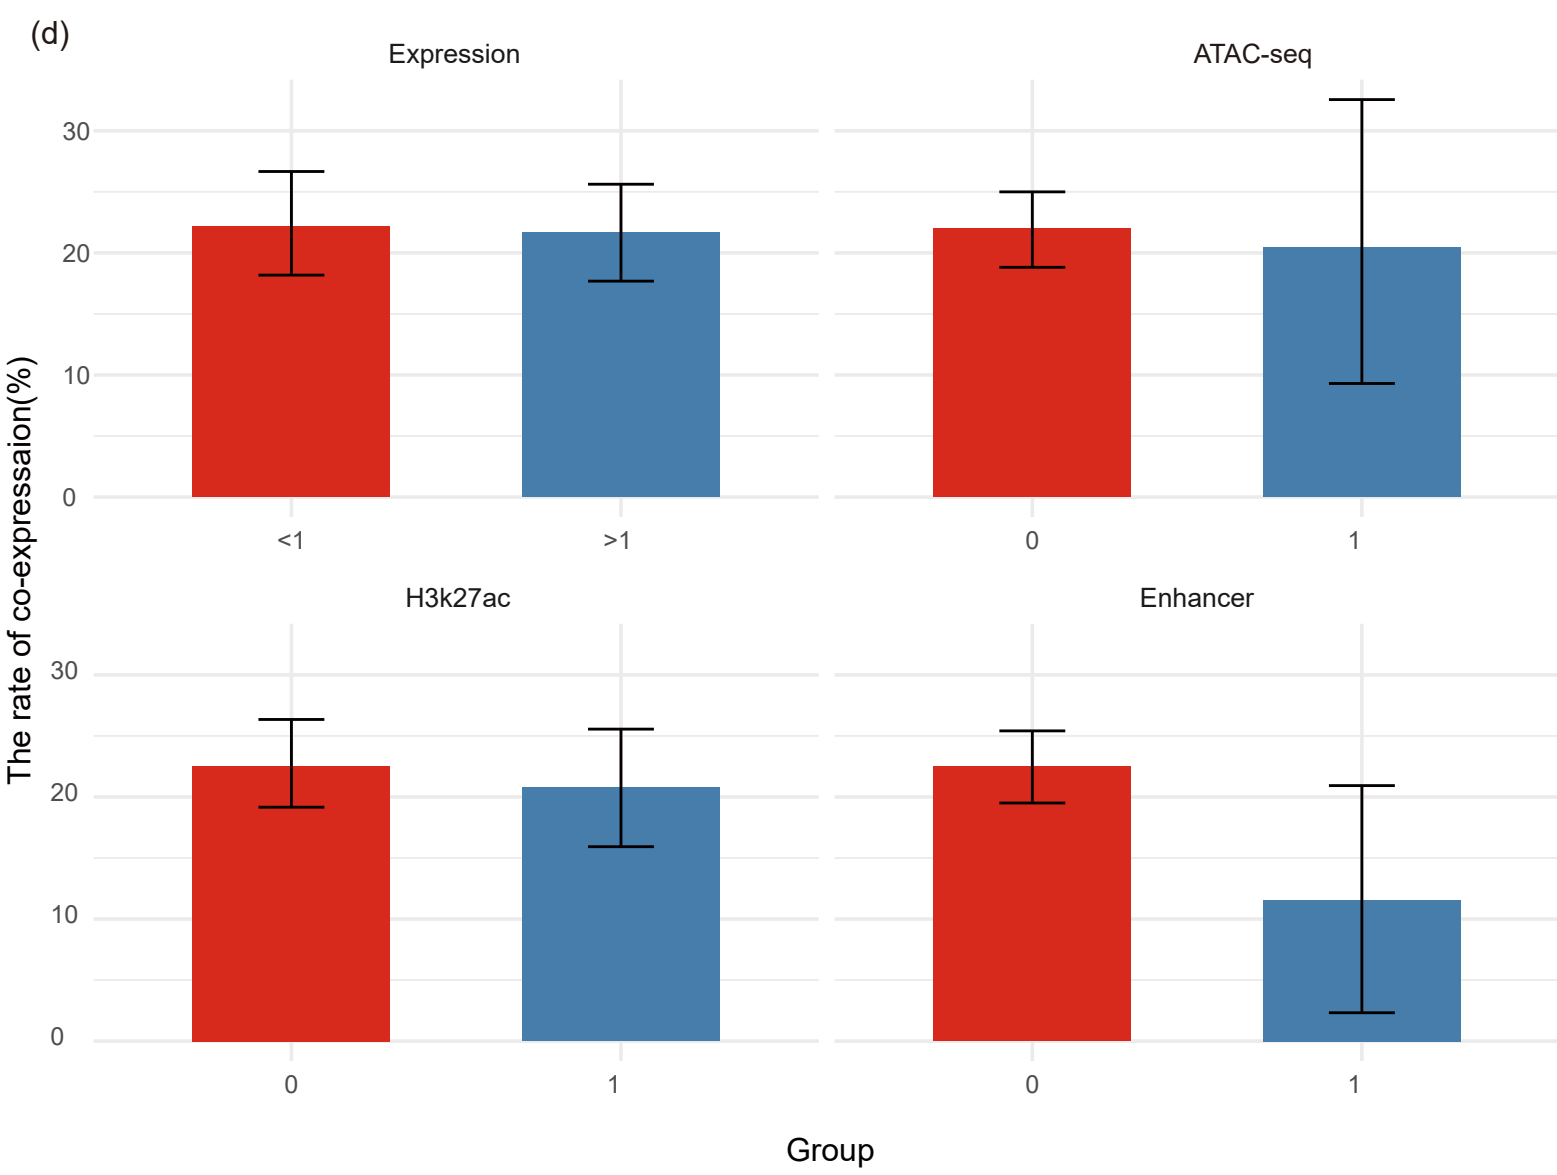

Supplement: Supplementary file 6 [file d5618440da1d7aec7b3baf28.pdf]
